# Supplementary material for: Euoplocephalus tutus and the Diversity of Ankylosaurid Dinosaurs in the Late Cretaceous of Alberta, Canada, and Montana, USA
Source: PLoS One. 2013 May 8;8(5):e62421. doi: 10.1371/journal.pone.0062421 (PMC3648582; doi:10.1371/journal.pone.0062421)
Supplement: Character Matrix S1 — (NEX) [file pone.0062421.s032.nex]

#NEXUS
[written Mon Mar 11 12:37:15 MDT 2013 by Mesquite  version 2.75 (build 564) at Dyoplosaurus/142.244.218.84]

BEGIN TAXA;
	TITLE Taxa;
	DIMENSIONS NTAX=18;
	TAXLABELS
		Lesothosaurus_diagnotsicus Scelidosaurus Stegosaurus Edmontonia Ankylosaurus_marginoventris Anodontosaurus_lambei Dyoplosaurus_acutosquameus Euoplocephalus_tutus Minotaurasaurus_ramachandrani Nodocephalosaurus_kirtlandensis Pinacosaurus_grangeri Pinacosaurus_mephistocephalus Saichania_chulsanensis Scolosaurus_cutleri Talarurus_plicatospineus Tarchia_gigantea Tianzhenosaurus_youngi Tsagantegia_longicranialis 
	;

END;


BEGIN CHARACTERS;
	TITLE  Arbour&Currie_Euoplocephalus_Matrix_1_Original_Codings;
	DIMENSIONS  NCHAR=170;
	FORMAT DATATYPE = STANDARD GAP = - MISSING = ? SYMBOLS = "  0 1 2";
	MATRIX
	Lesothosaurus_diagnotsicus       00000000000000000000000000000000000?0000000000000000?0?0?00?0000000000001?000?????00?0?00?00000010000000000?000000000000000000?000000000000000000000100?0000100000?000?000
	Scelidosaurus                    000001000000000000?000?010111001000?1000000000???000?001000???010001?110100?0?????00?0?00?00001011100000?1000?00000000?0000000?11000??0001000000100000000000101011?0000100
	Stegosaurus                      1000100000000000000000001011100100??11100000000000000001010010110?00110000000?????00?0?00?01?01121?110000010000000010000100000001010100101000101000010101000211100?000?000
	Edmontonia                       10101100000100111020010110111011011011111111110101010101010?1?1110111111110111111001010001111111111?1110121010100?0100?0??21?????0111101110?10101?10211010????101201000100
	Ankylosaurus_marginoventris      1111010110110111111111?111111101111111110000111111100001110?111101111100000?110010111111111???11111111?0??020011111????1010010?10100??????0???????0110101111??10111000?101
	Anodontosaurus_lambei            111101211011011111111111102?1101111111110000111111101101110111111?111101001?110000011111111?????????111?02000?11111????????????001?????111011?????01?010111?2010??1??????1
	Dyoplosaurus_acutosquameus       ??????????????????????????????1????????????????????????????????01???????????10????????????????????????????10001?1?1????????????????0???001011??????1201????121???????00?01
	Euoplocephalus_tutus             1111012110111111111111111111110111111111000011111111001111011111101111111011110000011111111??011?110111002111011111011010100101011001?111101111011011010111121101110000101
	Minotaurasaurus_ramachandrani    1111011101?1111?111010?111??110??0?01011000000101?101?0?1???10111011?1101011110001111110011???????????????????????????????????????????????????????????????????????????????
	Nodocephalosaurus_kirtlandensis  111??????????0?1??????????11110??????????????????????0111???????????????????11?0?1?1111????????????????????1??0???????????????????????????????????????????????????????????
	Pinacosaurus_grangeri            111101110111111111111020111111011111111100001110101100011101101110111101100111????11111?101??01?21?1111001?01001111010?1??00?0100100101111011?10?10110101111?110111000?101
	Pinacosaurus_mephistocephalus    11110?2001??111??????1??11??1111?0??????????????????????????1?1110?1?1000???1?????1111111011?????????110?1???01?1?1????1111??0???10?10?10100????????????????????121??0?0?1
	Saichania_chulsanensis           11110121011110111111112110111101111111111000111010100011111?1111101111111011111001111111111111112??011?0?????0?1111????1??00?0100100101????1?????1????????????10111000?101
	Scolosaurus_cutleri              1111012???111???1??????11?111101111111110?????????11100111?111?10???????????1110?01111111?????????1???1002?0?01111100101010010?001????11110110????01????11012110?210?1?101
	Talarurus_plicatospineus         11110??????1001?1?????????11110??1??????0?????????10?02101011???????????????1100??011??11??????121?011100100?0111110?1010100?1???100101111011110?10110101111111011100??101
	Tarchia_gigantea                 1111011101110011111111201111110111111111000011011111001111110111101111100011111001111111111??????????????????011111??????????????10??11????1?????1????????????10111?0??1?1
	Tianzhenosaurus_youngi           11110110??111011111?11101111110111111111?00?1?0010100011????11111011?1??????1100110111111??11011?1?01010010?1011111?????1?00?1???100121111001?10??01?01?11112?101??00??101
	Tsagantegia_longicranialis       1110011010??0011111111?0111111011111111110001?001?1?0011??0?1111????????????1000000111111?????????????????????????????????????????????????????????????????????????????????

;

END;
BEGIN MESQUITECHARMODELS;
	ProbModelSet * UNTITLED   =  'Mk1 (est.)':  1 -  170;
END;

BEGIN ASSUMPTIONS;
	TYPESET * UNTITLED   =  unord:  1 -  170;

END;

Begin MESQUITE;
		MESQUITESCRIPTVERSION 2;
		TITLE AUTO;
		tell ProjectCoordinator;
		timeSaved 1363027035333;
		getEmployee #mesquite.minimal.ManageTaxa.ManageTaxa;
		tell It;
			setID 0 4855540139498979998;
			tell It;
				setDefaultOrder  0 3 5 12 8 17 53 13 25 28 33 34 37 16 45 46 49 50;
				attachments ;
			endTell;
		endTell;
		getEmployee #mesquite.charMatrices.ManageCharacters.ManageCharacters;
		tell It;
			setID 0 3267736817554660875;
			mqVersion 275;
			checksumv 0 3 2632820538 null  getNumChars 170 numChars 170 getNumTaxa 18 numTaxa 18   short true   bits 7   states 7   sumSquaresStatesOnly 5979.0 sumSquares 5979.0 longCompressibleToShort false usingShortMatrix true   NumFiles 1 NumMatrices 1;
			mqVersion;
		endTell;
		getWindow;
		tell It;
			suppress;
			setResourcesState true false 100;
			setPopoutState 400;
			setExplanationSize 0;
			setAnnotationSize 0;
			setFontIncAnnot 0;
			setFontIncExp 0;
			setSize 1280 692;
			setLocation -8 0;
			setFont SanSerif;
			setFontSize 10;
			getToolPalette;
			tell It;
			endTell;
			setActive;
			desuppress;
		endTell;
		getEmployee  #mesquite.charMatrices.BasicDataWindowCoord.BasicDataWindowCoord;
		tell It;
			showDataWindow #3267736817554660875 #mesquite.charMatrices.BasicDataWindowMaker.BasicDataWindowMaker;
			tell It;
				getWindow;
				tell It;
					setExplanationSize 30;
					setAnnotationSize 20;
					setFontIncAnnot 0;
					setFontIncExp 0;
					setSize 0 -67;
					setLocation -8 0;
					setFont SanSerif;
					setFontSize 10;
					getToolPalette;
					tell It;
						setTool mesquite.charMatrices.BasicDataWindowMaker.BasicDataWindow.ibeam;
					endTell;
					setTool mesquite.charMatrices.BasicDataWindowMaker.BasicDataWindow.ibeam;
					colorCells  #mesquite.charMatrices.NoColor.NoColor;
					colorRowNames  #mesquite.charMatrices.TaxonGroupColor.TaxonGroupColor;
					colorColumnNames  #mesquite.charMatrices.CharGroupColor.CharGroupColor;
					colorText  #mesquite.charMatrices.NoColor.NoColor;
					setBackground White;
					toggleShowNames on;
					toggleShowTaxonNames on;
					toggleTight off;
					toggleThinRows off;
					toggleShowChanges on;
					toggleSeparateLines off;
					toggleShowStates on;
					toggleAutoWCharNames on;
					toggleAutoTaxonNames off;
					toggleShowDefaultCharNames off;
					toggleConstrainCW on;
					toggleBirdsEye off;
					toggleShowPaleGrid off;
					toggleShowPaleCellColors off;
					togglePaleInapplicable on;
					toggleShowBoldCellText off;
					toggleAllowAutosize on;
					toggleColorsPanel off;
					toggleDiagonal on;
					setDiagonalHeight 80;
					toggleLinkedScrolling on;
					toggleScrollLinkedTables off;
				endTell;
				showWindow;
				getWindow;
				tell It;
					forceAutosize;
				endTell;
				getEmployee #mesquite.charMatrices.ColorByState.ColorByState;
				tell It;
					setStateLimit 9;
					toggleUniformMaximum on;
				endTell;
				getEmployee #mesquite.charMatrices.ColorCells.ColorCells;
				tell It;
					setColor Red;
					removeColor off;
				endTell;
				getEmployee #mesquite.categ.StateNamesStrip.StateNamesStrip;
				tell It;
					showStrip off;
				endTell;
				getEmployee #mesquite.charMatrices.AnnotPanel.AnnotPanel;
				tell It;
					togglePanel off;
				endTell;
				getEmployee #mesquite.charMatrices.CharReferenceStrip.CharReferenceStrip;
				tell It;
					showStrip off;
				endTell;
				getEmployee #mesquite.charMatrices.QuickKeySelector.QuickKeySelector;
				tell It;
					autotabOff;
				endTell;
				getEmployee #mesquite.charMatrices.SelSummaryStrip.SelSummaryStrip;
				tell It;
					showStrip off;
				endTell;
				getEmployee #mesquite.categ.SmallStateNamesEditor.SmallStateNamesEditor;
				tell It;
					panelOpen true;
				endTell;
			endTell;
		endTell;
		endTell;
end;
