# Supplementary material for: Euoplocephalus tutus and the Diversity of Ankylosaurid Dinosaurs in the Late Cretaceous of Alberta, Canada, and Montana, USA
Source: PLoS One. 2013 May 8;8(5):e62421. doi: 10.1371/journal.pone.0062421 (PMC3648582; doi:10.1371/journal.pone.0062421)
Supplement: Character Matrix S2 — (NEX) [file pone.0062421.s033.nex]

#NEXUS
[written Mon Mar 11 12:40:38 MDT 2013 by Mesquite  version 2.75 (build 564) at Dyoplosaurus/142.244.218.84]

BEGIN TAXA;
	TITLE Taxa;
	DIMENSIONS NTAX=18;
	TAXLABELS
		Lesothosaurus_diagnosticus Scelidosaurus Stegosaurus Edmontonia Ankylosaurus_magniventris Anodontosaurus_lambei Dyoplosaurus_acutosquameus Euoplocephalus_tutus Minotaurasaurus_ramachandrani Nodocephalosaurus_kirtlandensis Pinacosaurus_grangeri Pinacosaurus_mephistocephalus Saichania_chulsanensis Scolosaurus_cutleri Talarurus_plicatospineus Tarchia_gigantea Tianzhenosaurus_youngi Tsagantegia_longicranialis 
	;

END;


BEGIN CHARACTERS;
	TITLE  Arbour&Currie_Euoplocephalus_Matrix_2_Updated_Codings;
	DIMENSIONS  NCHAR=170;
	FORMAT DATATYPE = STANDARD GAP = - MISSING = ? SYMBOLS = "  0 1 2 3";
	CHARSTATELABELS 
		1 'Antorbital fenestra: present (0) absent (1). ', 2 'Lateral temporal fenestra, visible in lateral view: visible (0) hidden (1). ', 3 'Supratemporal fenestra: open (0) closed (1). ', 4 'Skull dimensions, including ornamentation: longer than wide (0) as wide, or wider than long (1).', 5 'Width of the posterior margin of the skull relative to the maximum width across the orbits: greater or equal (0) less (1). ', 6 'Size of occiput: higher than wide (0) wider than high (1). ', 7 'External nares, opening faces: laterally (0) anterolaterally (1) anteriorly (2).', 8 'External nares, visible in dorsal view: visible (0) hidden (1). ', 9 'Near vertical narial septum separating the respiratory passage and lateral sinus: absent (0) present (1). ', 10 'Near horizontal narial septum separating the respiratory passage and lateral sinus: absent (0) present (1). ', 11 'Shape of respiratory passage: straight (0) sinuous (1).', 12 'Lateral sinuses: absent (0) present (1). ', 13 'Orbits, angle of orbital axis: <40� (0) >40� (1). ', 14 'Antorbital region of the dorsal skull surface: flat (0) domed (1). ', 15 'Development of the postocular shelf: not developed (0) completely separating orbit from temporal space (1). ', 16 'Gap between palate and braincase: open (0) closed by a dorsal projection of the pterygoid (1). ', 17 'Cranial sutures in adult specimens: visible (0) obliterated (1). ', 18 'Dimensions of premaxillary palate: longer than wide (0) wider than long (1)', 19 'Shape of the premaxillary palate: sub-triangular (0) sub-quadrate (1) sub-oval (2).', 20 '?V? or ?U?-shaped median indentation of the anterior margin of the premaxilla: absent (0) present (1).', 21 'Caudoventral extension of premaxillary tomium in lateral view: ends anteriorly to the maxillary teeth (0) obscures anteriormost maxillary teeth (1). ', 22 'Bone bordering anterior margin of internal nares: premaxilla (0) maxilla (1). ', 23 'Shape of the ventral margin of premaxillary tomium in lateral view: flat (0) convex (1) concave (2). ', 24 'Shape of the maxillary tooth row: straight (0) medially convex (1). ', 25 'Maxillary tooth row position: lateral margin of skull (0) inset (1). ', 26 'Distance between posteriormost extent of maxillary tooth rows relative to the width of the premaxillary beak: wider (0) narrower (1). ', 27 'Palpebral shape: rod (0) plate (1), absent (2). ', 28 'Form of palpebral articulation: mobile contact with prefrontal (0) extensive sutural contact with prefrontal, frontal and postorbital (1). ', 29 'Anterior and posterior supraorbitals (recognisable by distinct regions of ornamentation above the orbit): absent (0) present (1). ', 30 'Form of supraorbital ornamentation: boss-like, rounded laterally (0) sharp lateral rim, forming a ridge (1). ', 31 'Form of the parietal surface: not domed (0) domed (1). ', 32 'Proportions of jugal orbital ramus: depth greater than transverse breadth (0) transverse breadth greater than depth (1). ', 33 'Shape of quadrate in lateral aspect: curved (anteriorly convex, posteriorly concave) (0) straight (1). ', 34 'Inclination of quadrate in lateral aspect: near vertical (0) almost 45� rostrolaterally (1). ', 35 'Form of the anterior surface of the quadrate: transversely concave (0) not concave (1). ', 36 'Ventral projection of the mandibular process of the quadrate in lateral view: projects beyond the quadratojugal ornamentation (0) hidden by quadratojugal ornamentation (1). ', 37 'Form of quadrate mandibular extremity: symmetrical (0) medial condyle larger than lateral condyle (1). ', 38 'Inclination of the articular surface of the quadrate condyle in posterior view: horizontal (0) ventromedially inclined at approximately 45� to horizontal (1). ', 39 'Lateral ramus of the quadrate: present (0) absent (1). ', 40 'Dorsoventral depth of the pterygoid process of the quadrate: deep (0) shallow (1). ', 41 'Contact between paroccipital process and quadrate: sutural (0) fused (1). ', 42 'Contact between pterygoids: pterygoids separate caudomedially, forming an interpterygoid vacuity (0) pterygoids joined medially forming a pterygoid shield (1). ', 43 'Direction of the pterygoid flange: anterolateral (0) anterior/parasagittal (1). ', 44 'Contact between basipterygoid processes and pterygoid: sutural (0) fused (1). ', 45 'Position of ventral margin of the pterygovomerine keel relative to alveolar ridge: dorsal (0) level (1). ', 46 'Dorsal extent of median vomer lamina: does not meet skull roof (0) meets skull roof (1). ', 47 'Pterygoid foramen: absent (0) present (1). ', 48 'Position of posterior margin of pterygoid body relative to the anterior margin of the quadrate condyle: anteriorly positioned (0) in transverse alignment (1). ', 49 'Caudoventral secondary palate: absent (0) present (1). ', 50 'Posterior palatal foramen: absent (0) present (1). ', 51 'Direction of paroccipital process extension: caudolateral (0) lateral (1).', 52 'Depth of the distal end of paroccipital processes: expanded (0) not expanded (1). ', 53 'Thickness of bone at the dorsal margin of the foramen magnum relative to surrounding bone: little difference (0) distinctly thickened (1). ', 54 'Bones forming the occipital condyle: basioccipital and exoccipital (0) basioccipital only (1). ', 55 'Form of the ventral surface of basioccipital-basisphenoid region of the braincase: transversely convex (0) has a medial depression (1) has a medial longitudinal ridge (2). ', 56 'Length of basisphenoid relative to the basioccipital: longer (0) shorter or equal (1).', 57 'Form of basisphenoidal tuberosities: medially separated rounded rugose stubs (0) continuous transverse rugose ridge (1). ', 58 'Size of basipterygoid processes: twice as long as wide or over (0) less than twice as long as wide (1).', 59 'Form of the cranial nerve foramina IX-XII: separate foramina (0) single foramen shared with the jugular vein (1). ', 60 'Degree of endocranial flexure: strong (0) weak (1). ', 61 'Direction of occipital condyle: posterior (0) posteroventral (1).', 62 'Direction of the foramen magnum: posterior (0) posteroventral (1).', 63 'Premaxillary teeth: present (0) absent (1). ', 64 'Cingula on maxillary and/or dentary teeth: absent (0) present (1).', 65 'Maxillary and/or dentary tooth crown shape: ?13 denticles, tooth crown pointed (0) <13 denticles, tooth crown rounded (1).  ', 66 'Number of dentary teeth: <25 (0) ?25 (1).', 67 'Position of mandible articulation relative to mandibular adductor fossa: posterior (0) posteromedial (1). ', 68 'Mandibular fenestra: present (0) absent (1).', 69 'Depth of the dentary symphysial ramus relative to half the maximum depth of the mandibular ramus in lateral view: deeper (0) shallower (1). ', 70 'Shape of dorsal margin of the dentary in lateral view: straight (0) sinuous (1). ', 71 'Shape of ventral margin of the dentary in lateral view: straight (0) sinuous (1). ', 72 'Shape of the alveolar margin: weakly convex (0) strongly convex (1). ', 73 'Development of the coronoid process: not developed (0) distinct (1). ', 74 'Position of glenoid for quadrate relative to mandibular axis: medially offset (0) in line (1). ', 75 'Size and projection of the retroarticular process: small with no dorsal projection (0) well developed with a dorsal projection (1).', 76 'Size of predentary ventral process: distinct, prong shaped process (0) rudimentary eminence (1). ', 77 'Ornamentation, defined as sculpturing of skull bones or addition of osteoderms: absent (0) present (1). ', 78 'Cranial armour pattern: amorphous, rugose (0) pattern of polygons covering the skull roof (1). ', 79 'Distribution of polygons on skull roof: random (0) symmetrical (1). ', 80 'A single large medial polygon of ornamentation in the parietal region: absent (0) present (1). ', 81 'A single medial polygon located posteriorly to the external nares: absent (0) present (1). ', 82 'Surface of polygonal ornamentation on the dorsal surface of the skull: flat (0) domed (1). ', 83 'Projection of postorbital/squamosal ?horns? relative to the posterior margin of the dorsal surface of the skull horns end anteriorly (0) horns extend posteriorly beyond skull roof (1). ', 84 'Postorbital/squamosal ?horn?: absent (0) present (1). ', 85 'Shape of postorbital/squamosal ?horn?: rounded (0) pyramidal (1). ', 86 'Quadratojugal ?horn?: absent (0) present (1). ', 87 'Shape of quadratojugal ?horn?: rounded (0) pyramidal (1).', 88 'Raised nuchal sculpturing, defined as a transversely expanded region of ornamentation at the posterior margin of the skull roof: absent (0) present (1). ', 89 'Posterior projection of the nuchal shelf: does not obscure occiput in dorsal view (0) obscures occiput in dorsal view (1). ', 90 'Length of mandibular osteoderm with respect to the length of the mandible: less than or equal to half the length (0) over three quarters the length (1). ', 91 'Mandibular osteoderm: absent (0) present (1).', 92 'Type of articulation between the atlantal neural arch and intercentrum: open (0) fused in adult (1). ', 93 'Type of contact between the atlantal neural arches: no median contact (0) median contact (1). ', 94 'Contact between atlas and axis: articulated (0) fused (1). ', 95 'Dimensions of cervical vertebrae centra: anteroposteriorly longer than transverse width (0) anteroposteriorly shorter than transverse width (1). ', 96 'Ratio of maximum neural spine width to height in anterior cervicals:  <0.25 (0) ?0.25 (1). ', 97 'Alignment of anterior and posterior faces of cervical centra: aligned (0) anterior face dorsal to posterior face (1) anterior face ventral to posterior face (2). ', 98 'Ratio of anteroposterior centrum length to posterior centrum height: >1.1 (0) <1.1 (1). ', 99 'Longitudinal keel on ventral surface of dorsal centra: present (0) absent (1). ', 100 'Cross sectional shape of neural canal in posterior dorsals: circular (0) elliptical, with long axis running dorsoventrally (1). ', 101 'Shape of the proximal cross-section of the dorsal ribs: triangular (0) ?L?- or ?T?-shaped (1). ', 102 'Attachment of dorsal ribs to posterior dorsal vertebrae: articulated (0) fused (1). ', 103 'Contact between posteriormost dorsal vertebrae: articulated (0) fused to form a presacral rod (1). ', 104 'Paravertebrae: absent (0) present (1).', 105 'Longitudinal groove in ventral surface of the sacrum: absent (0) present (1). ', 106 'Number of sacral vertebrae: 5 (0) 4 (1) 3 (2). ', 107 'Ratio of maximum distal width to height of the neural spines of proximal caudals: ?0.2 (0) >0.2 (1). ', 108 'Direction of the transverse processes of proximal caudals: craniolaterally projecting (0) caudolaterally projecting (1) laterally projecting (2). ', 109 'Length of transverse processes relative to neural spine height in proximal caudals: sub-equal (0) approximately twice the length (1).', 110 'Persistence of transverse processes down the length of the caudal series: not present beyond the mid-length of the series (0) present beyond the mid-length of the series (1). ', 111 'Attachment of haemal arches to their respective centra: articulated (0) fused (1). ', 112 'Shape of distal caudal postzygapophyses: short with a sub-triangular end [wedge-shaped] (0) long with a rounded end [tongue shaped] (1). ', 113 'Extent of pre- and postzygapophyses over their adjacent centra in posterior vertebrae: extend over less than half the length of the adjacent centrum (0) extend over more than half the length of the ', 114 'Shape of the posterior haemal arches: rounded haemal spine in lateral view with no contact between haemal arches (0) inverted ?T?-shaped haemal spine in lateral view, with contact between the ', 115 'Ossified tendons in distal region of tail: absent (0) present (1).', 116 'Dimensions of coracoid: longer than wide (0 wider than long or equal width and length (1). ', 117 'Form of the anterior margin of the coracoid: convex (0) straight (1). ', 118 'Cranioventral process of coracoid: absent (0) present (1). ', 119 'Size of coracoid glenoid relative to scapula glenoid: sub-equal (0) half the size (1). ', 120 'Contact between scapula and coracoid: articulated (0) fused (1). ', 121 'Scapula glenoid orientation: ventrolateral (0) ventral (1). ', 122 'Ventral process of scapula at the caudoventral margin of glenoid: absent (0) present (1). ', 123 'Form of the scapula acromion process: not developed or ridge-like along the dorsal border of the scapula (0) flange-like and folded over towards the scapula glenoid (1) ridge terminating in a knob-like emin', 124 'Orientation of the acromion process of scapula: directed away from the glenoid (0) directed towards scapula glenoid (1). ', 125 'Scapulocoracoid buttress: absent (0) present (1). ', 126 'Distal end of scapula shaft: narrow (0) expanded (1). ', 127 'Contact between sternal plates: separate (0) fused (1). ', 128 'Separation of humeral head and deltopectoral crest in anterior view continuous (0) separated by a distinct notch (1). ', 129 'Separation of humeral head and medial tubercle in anterior view: continuous (0) separated by a distinct notch (1).', 130 'Ratio of deltopectoral crest length to humeral length: ?0.5 (0) >0.5 (1). ', 131 'Orientation of deltopectoral crest projection: lateral (0) anterolateral (1). ', 132 'Shape of the radial condyle of humerus round / proximal end of radius in end-on view: non-circular (0) circular (1). ', 133 'Ratio of the length of metacarpal V to metacarpal III: ?0.5 (0) >0.5 (1). ', 134 'Manual digit number: 5 (0) 4 (1) 3 (2).', 135 'Shape of manual and pedal ungual phalanges: claw shaped (0) hoof shaped (1). ', 136 'Length of the preacetabular process of ilium as a percentage of total ilium length: ? 50% (0) > 50 %. ', 137 'Angle of lateral deflection of the preacetabular process of the ilium: 10�?20� (0) 45� (1). ', 138 'Orientation of the preacetabular portion of the ilium: near vertical (0) near horizontal (1). ', 139 'Form of the preacetabular portion of the ilium: straight process (0) pronounced ventral curvature (1). ', 140 'Lateral exposure of the acetabulum: exposed (0) acetabulum partially obscured as it is partially encircled by the distal margin of the ilium (1).', 141 'Perforation of the acetabulum: present, open acetabulum (0) absent, closed acetabulum (1). ', 142 'Postacetabular ilium length, relative to diameter of acetabulum: greater (0) smaller (1).', 143 'Pubis size: large (0) reduced (1).', 144 'Prepubic process: present (0) absent (1).', 145 'Structure and rotation of the body of the pubis: gracile without dorsolateral rotation (0) massive and dorsolaterally rotated (1). ', 146 'Size of pubic contribution to acetabulum: over 25 % (0) less than 25 % (1). ', 147 'Shape of ischium: straight (0) ventrally flexed at mid-length (1). ', 148 'Shape of the dorsal margin of ischium: straight or concave (0) convex (1). ', 149 'Angle between long axis of femoral head and long axis of shaft: <100� (0) 100� to 120� (1) >120� (2). ', 150 'Separation of femoral head from greater trochanter: continuous (0) separated by a distinct notch or change in slope (1). ', 151 'Differentiation of the anterior trochanter of the femur: separated from femoral shaft by a deep groove laterally and dorsally (0) fused to femoral shaft (1). ', 152 'Oblique ridge on lateral femoral shaft, distal to anterior trochanter: absent (0) present (1). ', 153 'Form of the fourth trochanter: pendant (0) ridge-like (1). ', 154 'Location of the fourth trochanter on the femoral shaft: proximal (0) distal, over half-way down the femoral shaft (1). ', 155 'Maximum distal width of the tibia, compared to the maximum proximal width: narrower (0) wider (1). ', 156 'Contact between tibia and astragalus: articulated (0) fused, with suture obliterated (1). ', 157 'Number of pedal digits: 5 (0) 4 (1) 3 (2). ', 158 'Phalangeal number in pedal digit IV: 5 (0) ?4 (1). ', 159 'Parasagittal row of keeled osteoderms situated on the dorsal aspect of the trunk: absent (0) present (1). ', 160 'Large, laterally compressed plates on the dorsal aspect of the trunk: absent (0) present (1).', 161 'Lateral rows of osteoderms on the dorsal aspect of the trunk: absent (0) present (1). ', 162 'Number of distinct cervical pectoral bands: none (0) one (1) two (2). ', 163 'From of the cervical bands: separate at the midline, forming pairs of quarter rings (0) fused at the midline, forming half rings (1).', 164 'Pectoral spikes: absent (0) present (1). ', 165 'Form of pectoral spikes: no grooves and a solid base (0) posterior groove with a hollow base (1). ', 166 'Sacral shield of fused osteoderms: absent (0) present (1). ', 167 'Form of ossicles in sacral armour: irregular ossicles (0) sub-hexagonal ossicles of similar sizes (1). ', 168 'Size of lateral trunk plates, sacral plates and caudal plates: small (0) large and hollow based (1). ', 169 'Form of caudal plates: little dorsal projection (0) tall with thin dorsal extremity (1). ', 170 'Tail club: absent (0) present (1). ' ; 
	MATRIX
	Lesothosaurus_diagnosticus       00000000000000000000000000000000000?0000000000000000?0?0?00?0000000000001?000?????00?0?00?00000010000000000?000000000000000000?000000000000000000000100?0000100000?000?000
	Scelidosaurus                    000001000000000000?000?0102?1001000?1000000000???000?001000???010001?110100?0?????00?0?00?00001011100000?1000?00000000?0000000?11000??0001000000100000000000101011?0000100
	Stegosaurus                      100010000000000000000000102?100100??11100000000000000001010010110?00110000000?????00?0?00?01?01121?110000010000000010000100000001010100101000101000010101000211100?000?000
	Edmontonia                       101011000001001110200101102?1011011011111111110101010101010?1?1110111111110111111001010001111111111?1110121210100?0100?0??21?????0111111110?10101?10211010????1012010?0100
	Ankylosaurus_magniventris        1111010110110111111?11?1102?1101111111110000111111100101110?111101111100000?110010111111111???11111111?0??000011111????1010010?10100??1???0???????01201011112?10110000?101
	Anodontosaurus_lambei            111101211011011111111111102?1101111111110000111111101101110111111?111101001?110000011111111?????????111?02000?11111????????????001?????111011?????01?010111?2010??1??????1
	Dyoplosaurus_acutosquameus       ??1?????????????1?????????????0?????????????????????????????????1???????????1??????????1??????????????????1000111?1????????????????0??1?11011?????01201?1111211???????0?01
	Euoplocephalus_tutus             111101211011111111111121112?110111111111000011111111111111011111101111011011110000011111111??011?110111002100011111011010100101001001?11110111????0120101111211011100????1
	Minotaurasaurus_ramachandrani    1111011101?11011111?1??1112?1101101011110000?0101?10110111??1011101111101011110001111111011???????????????????????????????????????????????????????????????????????????????
	Nodocephalosaurus_kirtlandensis  111??1?????????11???????1?2?110?1??11????????????????1111???????????????????11?0?111111????????????????????0??????????????????????????????????????????????????????????????
	Pinacosaurus_grangeri            111101100111111111111021112?11011111111100001110101100011101101110111101100111???111111?101??01?2111111001?0101111101001?100?0100100101111011?10?10120101111?110111000?101
	Pinacosaurus_mephistocephalus    11110?2001??111?????????112?1111?0??????????????????????????1?1110?1?1000???1?????1111111011?????????110?1???011111????1111??0???10?10?1110???????????????????1?121??0?0?1
	Saichania_chulsanensis           111101210111101111111121102?1101111111111000111011110111111?1111101111111011111001111111111111112???11?0?????0?????????1?100?0100100101???????????????????????1011100??101
	Scolosaurus_cutleri              1111012???111???1??????11?111101111111110?????????11100111?111?10???????????1110?01111111?????????1???1002?0?01111100101010010?001????11110110????01????11012110?210?1?101
	Talarurus_plicatospineus         111101?????1001?1?????????2?110??1??????0?????????1??12101011???????????????1100?1011??11??????121?011100100?0111110?101010000?00100101111011110??0120101111111011100??101
	Tarchia_gigantea                 111101110111001111111121112?110111111111000011111111011111111111101111100011111001111111111??????????????????011111??????????????10???1???????????????????????101?1?0??1?1
	Tianzhenosaurus_youngi           11110110??11101?111?1??0112?110111111111?00????01?100?11????111?1???????????110011?111111????0?????0??1??1???0?11?????????????????????????????????????????????101??00????1
	Tsagantegia_longicranialis       1110011010??00?1111111?1112?11011111111110001?0010100111?10?1111?0??????????1100000111111?????????????????????????????????????????????????????????????????????????????????

;

END;
BEGIN ASSUMPTIONS;
	TYPESET * UNTITLED   =  unord:  1 -  170;

END;

BEGIN MESQUITECHARMODELS;
	ProbModelSet * UNTITLED   =  'Mk1 (est.)':  1 -  170;
END;

Begin MESQUITE;
		MESQUITESCRIPTVERSION 2;
		TITLE AUTO;
		tell ProjectCoordinator;
		timeSaved 1363027238386;
		getEmployee #mesquite.minimal.ManageTaxa.ManageTaxa;
		tell It;
			setID 0 4022142289709686726;
			tell It;
				setSelected  14;
				setDefaultOrder  0 1 2 5 3 15 42 6 8 9 10 11 12 16 14 38 18 39;
				attachments ;
			endTell;
		endTell;
		getEmployee #mesquite.charMatrices.ManageCharacters.ManageCharacters;
		tell It;
			setID 0 9012850029292029652;
			mqVersion 275;
			checksumv 0 3 1965166589 null  getNumChars 170 numChars 170 getNumTaxa 18 numTaxa 18   short true   bits 7   states 7   sumSquaresStatesOnly 6083.0 sumSquares 6083.0 longCompressibleToShort false usingShortMatrix true   NumFiles 1 NumMatrices 1;
			mqVersion;
		endTell;
		getWindow;
		tell It;
			suppress;
			setResourcesState true false 100;
			setPopoutState 400;
			setExplanationSize 0;
			setAnnotationSize 0;
			setFontIncAnnot 0;
			setFontIncExp 0;
			setSize 1280 692;
			setLocation -8 0;
			setFont SanSerif;
			setFontSize 10;
			getToolPalette;
			tell It;
			endTell;
			setActive;
			desuppress;
		endTell;
		getEmployee  #mesquite.charMatrices.BasicDataWindowCoord.BasicDataWindowCoord;
		tell It;
			showDataWindow #9012850029292029652 #mesquite.charMatrices.BasicDataWindowMaker.BasicDataWindowMaker;
			tell It;
				getWindow;
				tell It;
					getTable;
					tell It;
						rowNamesWidth 168;
					endTell;
					setExplanationSize 30;
					setAnnotationSize 20;
					setFontIncAnnot 0;
					setFontIncExp 0;
					setSize 0 -67;
					setLocation -8 0;
					setFont SanSerif;
					setFontSize 10;
					getToolPalette;
					tell It;
						setTool mesquite.charMatrices.BasicDataWindowMaker.BasicDataWindow.ibeam;
					endTell;
					setTool mesquite.charMatrices.BasicDataWindowMaker.BasicDataWindow.ibeam;
					colorCells  #mesquite.charMatrices.NoColor.NoColor;
					colorRowNames  #mesquite.charMatrices.TaxonGroupColor.TaxonGroupColor;
					colorColumnNames  #mesquite.charMatrices.CharGroupColor.CharGroupColor;
					colorText  #mesquite.charMatrices.NoColor.NoColor;
					setBackground White;
					toggleShowNames on;
					toggleShowTaxonNames on;
					toggleTight off;
					toggleThinRows off;
					toggleShowChanges on;
					toggleSeparateLines off;
					toggleShowStates on;
					toggleAutoWCharNames on;
					toggleAutoTaxonNames off;
					toggleShowDefaultCharNames off;
					toggleConstrainCW on;
					toggleBirdsEye off;
					toggleShowPaleGrid off;
					toggleShowPaleCellColors off;
					togglePaleInapplicable on;
					toggleShowBoldCellText off;
					toggleAllowAutosize on;
					toggleColorsPanel off;
					toggleDiagonal on;
					setDiagonalHeight 80;
					toggleLinkedScrolling on;
					toggleScrollLinkedTables off;
				endTell;
				showWindow;
				getWindow;
				tell It;
					forceAutosize;
				endTell;
				getEmployee #mesquite.charMatrices.ColorByState.ColorByState;
				tell It;
					setStateLimit 9;
					toggleUniformMaximum on;
				endTell;
				getEmployee #mesquite.charMatrices.ColorCells.ColorCells;
				tell It;
					setColor Red;
					removeColor off;
				endTell;
				getEmployee #mesquite.categ.StateNamesStrip.StateNamesStrip;
				tell It;
					showStrip off;
				endTell;
				getEmployee #mesquite.charMatrices.AnnotPanel.AnnotPanel;
				tell It;
					togglePanel off;
				endTell;
				getEmployee #mesquite.charMatrices.CharReferenceStrip.CharReferenceStrip;
				tell It;
					showStrip off;
				endTell;
				getEmployee #mesquite.charMatrices.QuickKeySelector.QuickKeySelector;
				tell It;
					autotabOff;
				endTell;
				getEmployee #mesquite.charMatrices.SelSummaryStrip.SelSummaryStrip;
				tell It;
					showStrip off;
				endTell;
				getEmployee #mesquite.categ.SmallStateNamesEditor.SmallStateNamesEditor;
				tell It;
					panelOpen true;
				endTell;
			endTell;
		endTell;
		endTell;
end;
