# Supplementary material for: Euoplocephalus tutus and the Diversity of Ankylosaurid Dinosaurs in the Late Cretaceous of Alberta, Canada, and Montana, USA
Source: PLOS journal article supplement (doi:10.1371/journal.pone.0062421), 2013-05-08
Supplement: S30 (10.1371/journal.pone.0062421.s030) [file journal.pone.0062421.s030]

Archive with 1 entries (1 files):
- doc.kml
