# Supplementary material for: Euoplocephalus tutus and the Diversity of Ankylosaurid Dinosaurs in the Late Cretaceous of Alberta, Canada, and Montana, USA
Source: PLOS journal article supplement (doi:10.1371/journal.pone.0062421), 2013-05-08
Supplement: S30 (10.1371/journal.pone.0062421.s030) [file journal.pone.0062421.s030 › doc.kml]

<?xml version="1.0" encoding="UTF-8"?>
<kml xmlns="http://www.opengis.net/kml/2.2" xmlns:gx="http://www.google.com/kml/ext/2.2" xmlns:kml="http://www.opengis.net/kml/2.2" xmlns:atom="http://www.w3.org/2005/Atom">
<Document>
	<name>Locality Data S1.kmz</name>
	<Style id="sh_open-diamond3">
		<IconStyle>
			<color>ffff5500</color>
			<scale>1.4</scale>
			<Icon>
				<href>http://maps.google.com/mapfiles/kml/shapes/open-diamond.png</href>
			</Icon>
		</IconStyle>
		<LabelStyle>
			<color>ffff5500</color>
		</LabelStyle>
	</Style>
	<Style id="sh_open-diamond11">
		<IconStyle>
			<color>ffff00aa</color>
			<scale>1.4</scale>
			<Icon>
				<href>http://maps.google.com/mapfiles/kml/shapes/open-diamond.png</href>
			</Icon>
		</IconStyle>
		<LabelStyle>
			<color>ffff00aa</color>
		</LabelStyle>
	</Style>
	<Style id="sn_open-diamond15">
		<IconStyle>
			<color>ffff5500</color>
			<scale>1.2</scale>
			<Icon>
				<href>http://maps.google.com/mapfiles/kml/shapes/open-diamond.png</href>
			</Icon>
		</IconStyle>
		<LabelStyle>
			<color>ffff5500</color>
		</LabelStyle>
	</Style>
	<Style id="sh_open-diamond6">
		<IconStyle>
			<color>ff00ff00</color>
			<scale>1.4</scale>
			<Icon>
				<href>http://maps.google.com/mapfiles/kml/shapes/open-diamond.png</href>
			</Icon>
		</IconStyle>
		<LabelStyle>
			<color>ff00ff00</color>
		</LabelStyle>
	</Style>
	<Style id="sn_open-diamond41">
		<IconStyle>
			<color>ffff5500</color>
			<scale>1.2</scale>
			<Icon>
				<href>http://maps.google.com/mapfiles/kml/shapes/open-diamond.png</href>
			</Icon>
		</IconStyle>
		<LabelStyle>
			<color>ffff5500</color>
		</LabelStyle>
	</Style>
	<StyleMap id="msn_open-diamond200">
		<Pair>
			<key>normal</key>
			<styleUrl>#sn_open-diamond27</styleUrl>
		</Pair>
		<Pair>
			<key>highlight</key>
			<styleUrl>#sh_open-diamond190</styleUrl>
		</Pair>
	</StyleMap>
	<Style id="sh_flag4">
		<IconStyle>
			<scale>1.4</scale>
			<Icon>
				<href>http://maps.google.com/mapfiles/kml/shapes/flag.png</href>
			</Icon>
			<hotSpot x="0.5" y="0" xunits="fraction" yunits="fraction"/>
		</IconStyle>
	</Style>
	<StyleMap id="msn_flag4">
		<Pair>
			<key>normal</key>
			<styleUrl>#sn_flag</styleUrl>
		</Pair>
		<Pair>
			<key>highlight</key>
			<styleUrl>#sh_flag30</styleUrl>
		</Pair>
	</StyleMap>
	<Style id="sh_flag30">
		<IconStyle>
			<scale>1.4</scale>
			<Icon>
				<href>http://maps.google.com/mapfiles/kml/shapes/flag.png</href>
			</Icon>
			<hotSpot x="0.5" y="0" xunits="fraction" yunits="fraction"/>
		</IconStyle>
	</Style>
	<StyleMap id="msn_open-diamond30">
		<Pair>
			<key>normal</key>
			<styleUrl>#sn_open-diamond26</styleUrl>
		</Pair>
		<Pair>
			<key>highlight</key>
			<styleUrl>#sh_open-diamond21</styleUrl>
		</Pair>
	</StyleMap>
	<StyleMap id="msn_open-diamond34">
		<Pair>
			<key>normal</key>
			<styleUrl>#sn_open-diamond20</styleUrl>
		</Pair>
		<Pair>
			<key>highlight</key>
			<styleUrl>#sh_open-diamond5</styleUrl>
		</Pair>
	</StyleMap>
	<StyleMap id="msn_open-diamond2">
		<Pair>
			<key>normal</key>
			<styleUrl>#sn_open-diamond4</styleUrl>
		</Pair>
		<Pair>
			<key>highlight</key>
			<styleUrl>#sh_open-diamond2</styleUrl>
		</Pair>
	</StyleMap>
	<Style id="sh_open-diamond">
		<IconStyle>
			<color>ffff5500</color>
			<scale>1.4</scale>
			<Icon>
				<href>http://maps.google.com/mapfiles/kml/shapes/open-diamond.png</href>
			</Icon>
		</IconStyle>
		<LabelStyle>
			<color>ffff5500</color>
		</LabelStyle>
	</Style>
	<Style id="sh_flag">
		<IconStyle>
			<scale>1.4</scale>
			<Icon>
				<href>http://maps.google.com/mapfiles/kml/shapes/flag.png</href>
			</Icon>
			<hotSpot x="0.5" y="0" xunits="fraction" yunits="fraction"/>
		</IconStyle>
	</Style>
	<StyleMap id="msn_open-diamond32">
		<Pair>
			<key>normal</key>
			<styleUrl>#sn_open-diamond000</styleUrl>
		</Pair>
		<Pair>
			<key>highlight</key>
			<styleUrl>#sh_open-diamond32</styleUrl>
		</Pair>
	</StyleMap>
	<Style id="sn_open-diamond16">
		<IconStyle>
			<color>ff00ff00</color>
			<scale>1.2</scale>
			<Icon>
				<href>http://maps.google.com/mapfiles/kml/shapes/open-diamond.png</href>
			</Icon>
		</IconStyle>
		<LabelStyle>
			<color>ff00ff00</color>
		</LabelStyle>
	</Style>
	<StyleMap id="msn_open-diamond120">
		<Pair>
			<key>normal</key>
			<styleUrl>#sn_open-diamond141</styleUrl>
		</Pair>
		<Pair>
			<key>highlight</key>
			<styleUrl>#sh_open-diamond25</styleUrl>
		</Pair>
	</StyleMap>
	<StyleMap id="msn_ylw-pushpin180">
		<Pair>
			<key>normal</key>
			<styleUrl>#sn_ylw-pushpin80</styleUrl>
		</Pair>
		<Pair>
			<key>highlight</key>
			<styleUrl>#sh_ylw-pushpin90</styleUrl>
		</Pair>
	</StyleMap>
	<StyleMap id="msn_open-diamond7">
		<Pair>
			<key>normal</key>
			<styleUrl>#sn_open-diamond23</styleUrl>
		</Pair>
		<Pair>
			<key>highlight</key>
			<styleUrl>#sh_open-diamond4</styleUrl>
		</Pair>
	</StyleMap>
	<Style id="sn_open-diamond0">
		<IconStyle>
			<color>ffff5500</color>
			<scale>1.2</scale>
			<Icon>
				<href>http://maps.google.com/mapfiles/kml/shapes/open-diamond.png</href>
			</Icon>
		</IconStyle>
		<LabelStyle>
			<color>ffff5500</color>
		</LabelStyle>
	</Style>
	<Style id="sh_open-diamond31">
		<IconStyle>
			<color>ff0000ff</color>
			<scale>1.4</scale>
			<Icon>
				<href>http://maps.google.com/mapfiles/kml/shapes/open-diamond.png</href>
			</Icon>
		</IconStyle>
		<LabelStyle>
			<color>ff0000ff</color>
		</LabelStyle>
	</Style>
	<StyleMap id="msn_open-diamond9">
		<Pair>
			<key>normal</key>
			<styleUrl>#sn_open-diamond9</styleUrl>
		</Pair>
		<Pair>
			<key>highlight</key>
			<styleUrl>#sh_open-diamond26</styleUrl>
		</Pair>
	</StyleMap>
	<Style id="sn_open-diamond50">
		<IconStyle>
			<color>ff00ff00</color>
			<scale>1.2</scale>
			<Icon>
				<href>http://maps.google.com/mapfiles/kml/shapes/open-diamond.png</href>
			</Icon>
		</IconStyle>
		<LabelStyle>
			<color>ff00ff00</color>
		</LabelStyle>
	</Style>
	<Style id="sn_open-diamond18">
		<IconStyle>
			<color>ff00ffff</color>
			<scale>1.2</scale>
			<Icon>
				<href>http://maps.google.com/mapfiles/kml/shapes/open-diamond.png</href>
			</Icon>
		</IconStyle>
		<LabelStyle>
			<color>ff00ffff</color>
		</LabelStyle>
	</Style>
	<StyleMap id="msn_flag">
		<Pair>
			<key>normal</key>
			<styleUrl>#sn_flag3</styleUrl>
		</Pair>
		<Pair>
			<key>highlight</key>
			<styleUrl>#sh_flag</styleUrl>
		</Pair>
	</StyleMap>
	<StyleMap id="msn_open-diamond24">
		<Pair>
			<key>normal</key>
			<styleUrl>#sn_open-diamond7</styleUrl>
		</Pair>
		<Pair>
			<key>highlight</key>
			<styleUrl>#sh_open-diamond18</styleUrl>
		</Pair>
	</StyleMap>
	<Style id="sh_open-diamond220">
		<IconStyle>
			<color>ff00ff00</color>
			<scale>1.4</scale>
			<Icon>
				<href>http://maps.google.com/mapfiles/kml/shapes/open-diamond.png</href>
			</Icon>
		</IconStyle>
		<LabelStyle>
			<color>ff00ff00</color>
		</LabelStyle>
	</Style>
	<Style id="sn_open-diamond000">
		<IconStyle>
			<color>ff0000ff</color>
			<scale>1.2</scale>
			<Icon>
				<href>http://maps.google.com/mapfiles/kml/shapes/open-diamond.png</href>
			</Icon>
		</IconStyle>
		<LabelStyle>
			<color>ff0000ff</color>
		</LabelStyle>
	</Style>
	<Style id="sn_open-diamond4">
		<IconStyle>
			<color>ff00ff00</color>
			<scale>1.2</scale>
			<Icon>
				<href>http://maps.google.com/mapfiles/kml/shapes/open-diamond.png</href>
			</Icon>
		</IconStyle>
		<LabelStyle>
			<color>ff00ff00</color>
		</LabelStyle>
	</Style>
	<Style id="sn_open-diamond20">
		<IconStyle>
			<color>ffff5500</color>
			<scale>1.2</scale>
			<Icon>
				<href>http://maps.google.com/mapfiles/kml/shapes/open-diamond.png</href>
			</Icon>
		</IconStyle>
		<LabelStyle>
			<color>ffff5500</color>
		</LabelStyle>
	</Style>
	<Style id="sn_open-diamond120">
		<IconStyle>
			<color>ff0000ff</color>
			<scale>1.2</scale>
			<Icon>
				<href>http://maps.google.com/mapfiles/kml/shapes/open-diamond.png</href>
			</Icon>
		</IconStyle>
		<LabelStyle>
			<color>ff0000ff</color>
		</LabelStyle>
	</Style>
	<StyleMap id="msn_open-diamond00">
		<Pair>
			<key>normal</key>
			<styleUrl>#sn_open-diamond32</styleUrl>
		</Pair>
		<Pair>
			<key>highlight</key>
			<styleUrl>#sh_open-diamond6</styleUrl>
		</Pair>
	</StyleMap>
	<Style id="sh_open-diamond5">
		<IconStyle>
			<color>ffff5500</color>
			<scale>1.4</scale>
			<Icon>
				<href>http://maps.google.com/mapfiles/kml/shapes/open-diamond.png</href>
			</Icon>
		</IconStyle>
		<LabelStyle>
			<color>ffff5500</color>
		</LabelStyle>
	</Style>
	<StyleMap id="msn_open-diamond110">
		<Pair>
			<key>normal</key>
			<styleUrl>#sn_open-diamond120</styleUrl>
		</Pair>
		<Pair>
			<key>highlight</key>
			<styleUrl>#sh_open-diamond22</styleUrl>
		</Pair>
	</StyleMap>
	<Style id="sh_open-diamond22">
		<IconStyle>
			<color>ff0000ff</color>
			<scale>1.4</scale>
			<Icon>
				<href>http://maps.google.com/mapfiles/kml/shapes/open-diamond.png</href>
			</Icon>
		</IconStyle>
		<LabelStyle>
			<color>ff0000ff</color>
		</LabelStyle>
	</Style>
	<Style id="sn_open-diamond22">
		<IconStyle>
			<color>ff0000ff</color>
			<scale>1.2</scale>
			<Icon>
				<href>http://maps.google.com/mapfiles/kml/shapes/open-diamond.png</href>
			</Icon>
		</IconStyle>
		<LabelStyle>
			<color>ff0000ff</color>
		</LabelStyle>
	</Style>
	<Style id="sh_open-diamond20">
		<IconStyle>
			<color>ff0000ff</color>
			<scale>1.4</scale>
			<Icon>
				<href>http://maps.google.com/mapfiles/kml/shapes/open-diamond.png</href>
			</Icon>
		</IconStyle>
		<LabelStyle>
			<color>ff0000ff</color>
		</LabelStyle>
	</Style>
	<StyleMap id="msn_open-diamond11">
		<Pair>
			<key>normal</key>
			<styleUrl>#sn_open-diamond6</styleUrl>
		</Pair>
		<Pair>
			<key>highlight</key>
			<styleUrl>#sh_open-diamond31</styleUrl>
		</Pair>
	</StyleMap>
	<Style id="sn_open-diamond1">
		<IconStyle>
			<color>ffff5500</color>
			<scale>1.2</scale>
			<Icon>
				<href>http://maps.google.com/mapfiles/kml/shapes/open-diamond.png</href>
			</Icon>
		</IconStyle>
		<LabelStyle>
			<color>ffff5500</color>
		</LabelStyle>
	</Style>
	<Style id="sh_open-diamond32">
		<IconStyle>
			<color>ff0000ff</color>
			<scale>1.4</scale>
			<Icon>
				<href>http://maps.google.com/mapfiles/kml/shapes/open-diamond.png</href>
			</Icon>
		</IconStyle>
		<LabelStyle>
			<color>ff0000ff</color>
		</LabelStyle>
	</Style>
	<StyleMap id="msn_open-diamond14">
		<Pair>
			<key>normal</key>
			<styleUrl>#sn_open-diamond11</styleUrl>
		</Pair>
		<Pair>
			<key>highlight</key>
			<styleUrl>#sh_open-diamond29</styleUrl>
		</Pair>
	</StyleMap>
	<Style id="sn_open-diamond17">
		<IconStyle>
			<color>ff00ff00</color>
			<scale>1.2</scale>
			<Icon>
				<href>http://maps.google.com/mapfiles/kml/shapes/open-diamond.png</href>
			</Icon>
		</IconStyle>
		<LabelStyle>
			<color>ff00ff00</color>
		</LabelStyle>
	</Style>
	<Style id="sh_open-diamond190">
		<IconStyle>
			<color>ff00ffff</color>
			<scale>1.4</scale>
			<Icon>
				<href>http://maps.google.com/mapfiles/kml/shapes/open-diamond.png</href>
			</Icon>
		</IconStyle>
		<LabelStyle>
			<color>ff00ffff</color>
		</LabelStyle>
	</Style>
	<StyleMap id="msn_open-diamond3">
		<Pair>
			<key>normal</key>
			<styleUrl>#sn_open-diamond0</styleUrl>
		</Pair>
		<Pair>
			<key>highlight</key>
			<styleUrl>#sh_open-diamond3</styleUrl>
		</Pair>
	</StyleMap>
	<StyleMap id="msn_flag3">
		<Pair>
			<key>normal</key>
			<styleUrl>#sn_flag2</styleUrl>
		</Pair>
		<Pair>
			<key>highlight</key>
			<styleUrl>#sh_flag1</styleUrl>
		</Pair>
	</StyleMap>
	<StyleMap id="msn_open-diamond18">
		<Pair>
			<key>normal</key>
			<styleUrl>#sn_open-diamond31</styleUrl>
		</Pair>
		<Pair>
			<key>highlight</key>
			<styleUrl>#sh_open-diamond20</styleUrl>
		</Pair>
	</StyleMap>
	<Style id="sn_open-diamond9">
		<IconStyle>
			<color>ff00ffff</color>
			<scale>1.2</scale>
			<Icon>
				<href>http://maps.google.com/mapfiles/kml/shapes/open-diamond.png</href>
			</Icon>
		</IconStyle>
		<LabelStyle>
			<color>ff00ffff</color>
		</LabelStyle>
	</Style>
	<Style id="sh_open-diamond1">
		<IconStyle>
			<color>ff00ff00</color>
			<scale>1.4</scale>
			<Icon>
				<href>http://maps.google.com/mapfiles/kml/shapes/open-diamond.png</href>
			</Icon>
		</IconStyle>
		<LabelStyle>
			<color>ff00ff00</color>
		</LabelStyle>
	</Style>
	<Style id="sn_open-diamond23">
		<IconStyle>
			<color>ff00ff55</color>
			<scale>1.2</scale>
			<Icon>
				<href>http://maps.google.com/mapfiles/kml/shapes/open-diamond.png</href>
			</Icon>
		</IconStyle>
		<LabelStyle>
			<color>ff00ff55</color>
		</LabelStyle>
	</Style>
	<Style id="sh_open-diamond18">
		<IconStyle>
			<color>ff0000ff</color>
			<scale>1.4</scale>
			<Icon>
				<href>http://maps.google.com/mapfiles/kml/shapes/open-diamond.png</href>
			</Icon>
		</IconStyle>
		<LabelStyle>
			<color>ff0000ff</color>
		</LabelStyle>
	</Style>
	<Style id="sh_open-diamond4">
		<IconStyle>
			<color>ff00ff55</color>
			<scale>1.4</scale>
			<Icon>
				<href>http://maps.google.com/mapfiles/kml/shapes/open-diamond.png</href>
			</Icon>
		</IconStyle>
		<LabelStyle>
			<color>ff00ff55</color>
		</LabelStyle>
	</Style>
	<Style id="sh_open-diamond100">
		<IconStyle>
			<color>ff00ff55</color>
			<scale>1.4</scale>
			<Icon>
				<href>http://maps.google.com/mapfiles/kml/shapes/open-diamond.png</href>
			</Icon>
		</IconStyle>
		<LabelStyle>
			<color>ff00ff55</color>
		</LabelStyle>
	</Style>
	<Style id="sn_open-diamond28">
		<IconStyle>
			<color>ff00ff00</color>
			<scale>1.2</scale>
			<Icon>
				<href>http://maps.google.com/mapfiles/kml/shapes/open-diamond.png</href>
			</Icon>
		</IconStyle>
		<LabelStyle>
			<color>ff00ff00</color>
		</LabelStyle>
	</Style>
	<StyleMap id="msn_grn-pushpin">
		<Pair>
			<key>normal</key>
			<styleUrl>#sn_grn-pushpin</styleUrl>
		</Pair>
		<Pair>
			<key>highlight</key>
			<styleUrl>#sh_grn-pushpin</styleUrl>
		</Pair>
	</StyleMap>
	<Style id="sn_open-diamond2">
		<IconStyle>
			<color>ff00ff00</color>
			<scale>1.2</scale>
			<Icon>
				<href>http://maps.google.com/mapfiles/kml/shapes/open-diamond.png</href>
			</Icon>
		</IconStyle>
		<LabelStyle>
			<color>ff00ff00</color>
		</LabelStyle>
	</Style>
	<Style id="sn_open-diamond32">
		<IconStyle>
			<color>ff00ff00</color>
			<scale>1.2</scale>
			<Icon>
				<href>http://maps.google.com/mapfiles/kml/shapes/open-diamond.png</href>
			</Icon>
		</IconStyle>
		<LabelStyle>
			<color>ff00ff00</color>
		</LabelStyle>
	</Style>
	<StyleMap id="msn_open-diamond10">
		<Pair>
			<key>normal</key>
			<styleUrl>#sn_open-diamond5</styleUrl>
		</Pair>
		<Pair>
			<key>highlight</key>
			<styleUrl>#sh_open-diamond140</styleUrl>
		</Pair>
	</StyleMap>
	<StyleMap id="msn_open-diamond40">
		<Pair>
			<key>normal</key>
			<styleUrl>#sn_open-diamond21</styleUrl>
		</Pair>
		<Pair>
			<key>highlight</key>
			<styleUrl>#sh_open-diamond100</styleUrl>
		</Pair>
	</StyleMap>
	<Style id="sn_ylw-pushpin80">
		<IconStyle>
			<scale>1.2</scale>
			<Icon>
				<href>http://maps.google.com/mapfiles/kml/shapes/flag.png</href>
			</Icon>
			<hotSpot x="0.5" y="0" xunits="fraction" yunits="fraction"/>
		</IconStyle>
		<LabelStyle>
			<color>ff00aa00</color>
		</LabelStyle>
	</Style>
	<StyleMap id="msn_flag10">
		<Pair>
			<key>normal</key>
			<styleUrl>#sn_flag4</styleUrl>
		</Pair>
		<Pair>
			<key>highlight</key>
			<styleUrl>#sh_flag2</styleUrl>
		</Pair>
	</StyleMap>
	<Style id="sn_flag00">
		<IconStyle>
			<scale>1.2</scale>
			<Icon>
				<href>http://maps.google.com/mapfiles/kml/shapes/flag.png</href>
			</Icon>
			<hotSpot x="0.5" y="0" xunits="fraction" yunits="fraction"/>
		</IconStyle>
	</Style>
	<StyleMap id="msn_open-diamond80">
		<Pair>
			<key>normal</key>
			<styleUrl>#sn_open-diamond28</styleUrl>
		</Pair>
		<Pair>
			<key>highlight</key>
			<styleUrl>#sh_open-diamond160</styleUrl>
		</Pair>
	</StyleMap>
	<Style id="sh_open-diamond29">
		<IconStyle>
			<color>ff0000ff</color>
			<scale>1.4</scale>
			<Icon>
				<href>http://maps.google.com/mapfiles/kml/shapes/open-diamond.png</href>
			</Icon>
		</IconStyle>
		<LabelStyle>
			<color>ff0000ff</color>
		</LabelStyle>
	</Style>
	<Style id="sh_open-diamond23">
		<IconStyle>
			<color>ff00ff00</color>
			<scale>1.4</scale>
			<Icon>
				<href>http://maps.google.com/mapfiles/kml/shapes/open-diamond.png</href>
			</Icon>
		</IconStyle>
		<LabelStyle>
			<color>ff00ff00</color>
		</LabelStyle>
	</Style>
	<Style id="sn_flag3">
		<IconStyle>
			<scale>1.2</scale>
			<Icon>
				<href>http://maps.google.com/mapfiles/kml/shapes/flag.png</href>
			</Icon>
			<hotSpot x="0.5" y="0" xunits="fraction" yunits="fraction"/>
		</IconStyle>
	</Style>
	<Style id="sh_open-diamond30">
		<IconStyle>
			<color>ff0000ff</color>
			<scale>1.4</scale>
			<Icon>
				<href>http://maps.google.com/mapfiles/kml/shapes/open-diamond.png</href>
			</Icon>
		</IconStyle>
		<LabelStyle>
			<color>ff0000ff</color>
		</LabelStyle>
	</Style>
	<Style id="sh_open-diamond8">
		<IconStyle>
			<color>ff00ffff</color>
			<scale>1.4</scale>
			<Icon>
				<href>http://maps.google.com/mapfiles/kml/shapes/open-diamond.png</href>
			</Icon>
		</IconStyle>
		<LabelStyle>
			<color>ff00ffff</color>
		</LabelStyle>
	</Style>
	<StyleMap id="msn_open-diamond26">
		<Pair>
			<key>normal</key>
			<styleUrl>#sn_open-diamond40</styleUrl>
		</Pair>
		<Pair>
			<key>highlight</key>
			<styleUrl>#sh_open-diamond30</styleUrl>
		</Pair>
	</StyleMap>
	<StyleMap id="msn_open-diamond5">
		<Pair>
			<key>normal</key>
			<styleUrl>#sn_open-diamond2</styleUrl>
		</Pair>
		<Pair>
			<key>highlight</key>
			<styleUrl>#sh_open-diamond1</styleUrl>
		</Pair>
	</StyleMap>
	<Style id="sn_flag1">
		<IconStyle>
			<scale>1.2</scale>
			<Icon>
				<href>http://maps.google.com/mapfiles/kml/shapes/flag.png</href>
			</Icon>
			<hotSpot x="0.5" y="0" xunits="fraction" yunits="fraction"/>
		</IconStyle>
	</Style>
	<Style id="sh_open-diamond13">
		<IconStyle>
			<color>ff00ff00</color>
			<scale>1.4</scale>
			<Icon>
				<href>http://maps.google.com/mapfiles/kml/shapes/open-diamond.png</href>
			</Icon>
		</IconStyle>
		<LabelStyle>
			<color>ff00ff00</color>
		</LabelStyle>
	</Style>
	<Style id="sn_open-diamond27">
		<IconStyle>
			<color>ff00ffff</color>
			<scale>1.2</scale>
			<Icon>
				<href>http://maps.google.com/mapfiles/kml/shapes/open-diamond.png</href>
			</Icon>
		</IconStyle>
		<LabelStyle>
			<color>ff00ffff</color>
		</LabelStyle>
	</Style>
	<StyleMap id="msn_open-diamond13">
		<Pair>
			<key>normal</key>
			<styleUrl>#sn_open-diamond15</styleUrl>
		</Pair>
		<Pair>
			<key>highlight</key>
			<styleUrl>#sh_open-diamond000</styleUrl>
		</Pair>
	</StyleMap>
	<Style id="sh_flag2">
		<IconStyle>
			<scale>1.4</scale>
			<Icon>
				<href>http://maps.google.com/mapfiles/kml/shapes/flag.png</href>
			</Icon>
			<hotSpot x="0.5" y="0" xunits="fraction" yunits="fraction"/>
		</IconStyle>
	</Style>
	<Style id="sn_open-diamond29">
		<IconStyle>
			<color>ff00ff00</color>
			<scale>1.2</scale>
			<Icon>
				<href>http://maps.google.com/mapfiles/kml/shapes/open-diamond.png</href>
			</Icon>
		</IconStyle>
		<LabelStyle>
			<color>ff00ff00</color>
		</LabelStyle>
	</Style>
	<Style id="sh_open-diamond12">
		<IconStyle>
			<color>ff00ffff</color>
			<scale>1.4</scale>
			<Icon>
				<href>http://maps.google.com/mapfiles/kml/shapes/open-diamond.png</href>
			</Icon>
		</IconStyle>
		<LabelStyle>
			<color>ff00ffff</color>
		</LabelStyle>
	</Style>
	<StyleMap id="msn_open-diamond19">
		<Pair>
			<key>normal</key>
			<styleUrl>#sn_open-diamond24</styleUrl>
		</Pair>
		<Pair>
			<key>highlight</key>
			<styleUrl>#sh_open-diamond17</styleUrl>
		</Pair>
	</StyleMap>
	<Style id="sn_open-diamond8">
		<IconStyle>
			<color>ffff00aa</color>
			<scale>1.2</scale>
			<Icon>
				<href>http://maps.google.com/mapfiles/kml/shapes/open-diamond.png</href>
			</Icon>
		</IconStyle>
		<LabelStyle>
			<color>ffff00aa</color>
		</LabelStyle>
	</Style>
	<Style id="sn_open-diamond26">
		<IconStyle>
			<color>ff00ffff</color>
			<scale>1.2</scale>
			<Icon>
				<href>http://maps.google.com/mapfiles/kml/shapes/open-diamond.png</href>
			</Icon>
		</IconStyle>
		<LabelStyle>
			<color>ff00ffff</color>
		</LabelStyle>
	</Style>
	<StyleMap id="msn_open-diamond1">
		<Pair>
			<key>normal</key>
			<styleUrl>#sn_open-diamond8</styleUrl>
		</Pair>
		<Pair>
			<key>highlight</key>
			<styleUrl>#sh_open-diamond11</styleUrl>
		</Pair>
	</StyleMap>
	<Style id="sn_open-diamond31">
		<IconStyle>
			<color>ff0000ff</color>
			<scale>1.2</scale>
			<Icon>
				<href>http://maps.google.com/mapfiles/kml/shapes/open-diamond.png</href>
			</Icon>
		</IconStyle>
		<LabelStyle>
			<color>ff0000ff</color>
		</LabelStyle>
	</Style>
	<Style id="sh_flag3">
		<IconStyle>
			<scale>1.4</scale>
			<Icon>
				<href>http://maps.google.com/mapfiles/kml/shapes/flag.png</href>
			</Icon>
			<hotSpot x="0.5" y="0" xunits="fraction" yunits="fraction"/>
		</IconStyle>
	</Style>
	<Style id="sh_open-diamond160">
		<IconStyle>
			<color>ff00ff00</color>
			<scale>1.4</scale>
			<Icon>
				<href>http://maps.google.com/mapfiles/kml/shapes/open-diamond.png</href>
			</Icon>
		</IconStyle>
		<LabelStyle>
			<color>ff00ff00</color>
		</LabelStyle>
	</Style>
	<Style id="sn_open-diamond5">
		<IconStyle>
			<color>ff00ffff</color>
			<scale>1.2</scale>
			<Icon>
				<href>http://maps.google.com/mapfiles/kml/shapes/open-diamond.png</href>
			</Icon>
		</IconStyle>
		<LabelStyle>
			<color>ff00ffff</color>
		</LabelStyle>
	</Style>
	<Style id="sn_open-diamond6">
		<IconStyle>
			<color>ff0000ff</color>
			<scale>1.2</scale>
			<Icon>
				<href>http://maps.google.com/mapfiles/kml/shapes/open-diamond.png</href>
			</Icon>
		</IconStyle>
		<LabelStyle>
			<color>ff0000ff</color>
		</LabelStyle>
	</Style>
	<Style id="sn_open-diamond">
		<IconStyle>
			<color>ffff5500</color>
			<scale>1.2</scale>
			<Icon>
				<href>http://maps.google.com/mapfiles/kml/shapes/open-diamond.png</href>
			</Icon>
		</IconStyle>
		<LabelStyle>
			<color>ffff5500</color>
		</LabelStyle>
	</Style>
	<Style id="sh_open-diamond21">
		<IconStyle>
			<color>ff00ffff</color>
			<scale>1.4</scale>
			<Icon>
				<href>http://maps.google.com/mapfiles/kml/shapes/open-diamond.png</href>
			</Icon>
		</IconStyle>
		<LabelStyle>
			<color>ff00ffff</color>
		</LabelStyle>
	</Style>
	<StyleMap id="msn_open-diamond25">
		<Pair>
			<key>normal</key>
			<styleUrl>#sn_open-diamond16</styleUrl>
		</Pair>
		<Pair>
			<key>highlight</key>
			<styleUrl>#sh_open-diamond23</styleUrl>
		</Pair>
	</StyleMap>
	<Style id="sn_open-diamond24">
		<IconStyle>
			<color>ff00ff00</color>
			<scale>1.2</scale>
			<Icon>
				<href>http://maps.google.com/mapfiles/kml/shapes/open-diamond.png</href>
			</Icon>
		</IconStyle>
		<LabelStyle>
			<color>ff00ff00</color>
		</LabelStyle>
	</Style>
	<Style id="sh_open-diamond000">
		<IconStyle>
			<color>ffff5500</color>
			<scale>1.4</scale>
			<Icon>
				<href>http://maps.google.com/mapfiles/kml/shapes/open-diamond.png</href>
			</Icon>
		</IconStyle>
		<LabelStyle>
			<color>ffff5500</color>
		</LabelStyle>
	</Style>
	<StyleMap id="msn_open-diamond16">
		<Pair>
			<key>normal</key>
			<styleUrl>#sn_open-diamond29</styleUrl>
		</Pair>
		<Pair>
			<key>highlight</key>
			<styleUrl>#sh_open-diamond13</styleUrl>
		</Pair>
	</StyleMap>
	<StyleMap id="msn_flag2">
		<Pair>
			<key>normal</key>
			<styleUrl>#sn_flag1</styleUrl>
		</Pair>
		<Pair>
			<key>highlight</key>
			<styleUrl>#sh_flag0</styleUrl>
		</Pair>
	</StyleMap>
	<Style id="sh_ylw-pushpin90">
		<IconStyle>
			<scale>1.4</scale>
			<Icon>
				<href>http://maps.google.com/mapfiles/kml/shapes/flag.png</href>
			</Icon>
			<hotSpot x="0.5" y="0" xunits="fraction" yunits="fraction"/>
		</IconStyle>
		<LabelStyle>
			<color>ff00aa00</color>
		</LabelStyle>
	</Style>
	<Style id="sn_flag0">
		<IconStyle>
			<scale>1.2</scale>
			<Icon>
				<href>http://maps.google.com/mapfiles/kml/shapes/flag.png</href>
			</Icon>
			<hotSpot x="0.5" y="0" xunits="fraction" yunits="fraction"/>
		</IconStyle>
	</Style>
	<Style id="sn_open-diamond11">
		<IconStyle>
			<color>ff0000ff</color>
			<scale>1.2</scale>
			<Icon>
				<href>http://maps.google.com/mapfiles/kml/shapes/open-diamond.png</href>
			</Icon>
		</IconStyle>
		<LabelStyle>
			<color>ff0000ff</color>
		</LabelStyle>
	</Style>
	<Style id="sh_open-diamond140">
		<IconStyle>
			<color>ff00ffff</color>
			<scale>1.4</scale>
			<Icon>
				<href>http://maps.google.com/mapfiles/kml/shapes/open-diamond.png</href>
			</Icon>
		</IconStyle>
		<LabelStyle>
			<color>ff00ffff</color>
		</LabelStyle>
	</Style>
	<Style id="sh_open-diamond27">
		<IconStyle>
			<color>ff00ff00</color>
			<scale>1.4</scale>
			<Icon>
				<href>http://maps.google.com/mapfiles/kml/shapes/open-diamond.png</href>
			</Icon>
		</IconStyle>
		<LabelStyle>
			<color>ff00ff00</color>
		</LabelStyle>
	</Style>
	<Style id="sn_grn-pushpin">
		<IconStyle>
			<color>ff00ff00</color>
			<scale>1.2</scale>
			<Icon>
				<href>http://maps.google.com/mapfiles/kml/shapes/open-diamond.png</href>
			</Icon>
		</IconStyle>
		<LabelStyle>
			<color>ff00ff00</color>
		</LabelStyle>
	</Style>
	<StyleMap id="msn_open-diamond23">
		<Pair>
			<key>normal</key>
			<styleUrl>#sn_open-diamond50</styleUrl>
		</Pair>
		<Pair>
			<key>highlight</key>
			<styleUrl>#sh_open-diamond220</styleUrl>
		</Pair>
	</StyleMap>
	<Style id="sn_flag4">
		<IconStyle>
			<scale>1.2</scale>
			<Icon>
				<href>http://maps.google.com/mapfiles/kml/shapes/flag.png</href>
			</Icon>
			<hotSpot x="0.5" y="0" xunits="fraction" yunits="fraction"/>
		</IconStyle>
	</Style>
	<Style id="sn_flag">
		<IconStyle>
			<scale>1.2</scale>
			<Icon>
				<href>http://maps.google.com/mapfiles/kml/shapes/flag.png</href>
			</Icon>
			<hotSpot x="0.5" y="0" xunits="fraction" yunits="fraction"/>
		</IconStyle>
	</Style>
	<Style id="sh_open-diamond19">
		<IconStyle>
			<color>ffff5500</color>
			<scale>1.4</scale>
			<Icon>
				<href>http://maps.google.com/mapfiles/kml/shapes/open-diamond.png</href>
			</Icon>
		</IconStyle>
		<LabelStyle>
			<color>ffff5500</color>
		</LabelStyle>
	</Style>
	<Style id="sn_open-diamond10">
		<IconStyle>
			<color>ff00ffff</color>
			<scale>1.2</scale>
			<Icon>
				<href>http://maps.google.com/mapfiles/kml/shapes/open-diamond.png</href>
			</Icon>
		</IconStyle>
		<LabelStyle>
			<color>ff00ffff</color>
		</LabelStyle>
	</Style>
	<Style id="sn_flag2">
		<IconStyle>
			<scale>1.2</scale>
			<Icon>
				<href>http://maps.google.com/mapfiles/kml/shapes/flag.png</href>
			</Icon>
			<hotSpot x="0.5" y="0" xunits="fraction" yunits="fraction"/>
		</IconStyle>
	</Style>
	<StyleMap id="msn_open-diamond41">
		<Pair>
			<key>normal</key>
			<styleUrl>#sn_open-diamond18</styleUrl>
		</Pair>
		<Pair>
			<key>highlight</key>
			<styleUrl>#sh_open-diamond7</styleUrl>
		</Pair>
	</StyleMap>
	<StyleMap id="msn_flag1">
		<Pair>
			<key>normal</key>
			<styleUrl>#sn_flag0</styleUrl>
		</Pair>
		<Pair>
			<key>highlight</key>
			<styleUrl>#sh_flag3</styleUrl>
		</Pair>
	</StyleMap>
	<Style id="sh_flag0">
		<IconStyle>
			<scale>1.4</scale>
			<Icon>
				<href>http://maps.google.com/mapfiles/kml/shapes/flag.png</href>
			</Icon>
			<hotSpot x="0.5" y="0" xunits="fraction" yunits="fraction"/>
		</IconStyle>
	</Style>
	<StyleMap id="msn_open-diamond21">
		<Pair>
			<key>normal</key>
			<styleUrl>#sn_open-diamond22</styleUrl>
		</Pair>
		<Pair>
			<key>highlight</key>
			<styleUrl>#sh_open-diamond9</styleUrl>
		</Pair>
	</StyleMap>
	<Style id="sh_open-diamond2">
		<IconStyle>
			<color>ff00ff00</color>
			<scale>1.4</scale>
			<Icon>
				<href>http://maps.google.com/mapfiles/kml/shapes/open-diamond.png</href>
			</Icon>
		</IconStyle>
		<LabelStyle>
			<color>ff00ff00</color>
		</LabelStyle>
	</Style>
	<StyleMap id="msn_open-diamond33">
		<Pair>
			<key>normal</key>
			<styleUrl>#sn_open-diamond17</styleUrl>
		</Pair>
		<Pair>
			<key>highlight</key>
			<styleUrl>#sh_open-diamond27</styleUrl>
		</Pair>
	</StyleMap>
	<Style id="sh_open-diamond26">
		<IconStyle>
			<color>ff00ffff</color>
			<scale>1.4</scale>
			<Icon>
				<href>http://maps.google.com/mapfiles/kml/shapes/open-diamond.png</href>
			</Icon>
		</IconStyle>
		<LabelStyle>
			<color>ff00ffff</color>
		</LabelStyle>
	</Style>
	<Style id="sh_grn-pushpin">
		<IconStyle>
			<color>ff00ff00</color>
			<scale>1.4</scale>
			<Icon>
				<href>http://maps.google.com/mapfiles/kml/shapes/open-diamond.png</href>
			</Icon>
		</IconStyle>
		<LabelStyle>
			<color>ff00ff00</color>
		</LabelStyle>
	</Style>
	<Style id="sh_flag1">
		<IconStyle>
			<scale>1.4</scale>
			<Icon>
				<href>http://maps.google.com/mapfiles/kml/shapes/flag.png</href>
			</Icon>
			<hotSpot x="0.5" y="0" xunits="fraction" yunits="fraction"/>
		</IconStyle>
	</Style>
	<StyleMap id="msn_flag0">
		<Pair>
			<key>normal</key>
			<styleUrl>#sn_flag00</styleUrl>
		</Pair>
		<Pair>
			<key>highlight</key>
			<styleUrl>#sh_flag4</styleUrl>
		</Pair>
	</StyleMap>
	<StyleMap id="msn_open-diamond">
		<Pair>
			<key>normal</key>
			<styleUrl>#sn_open-diamond</styleUrl>
		</Pair>
		<Pair>
			<key>highlight</key>
			<styleUrl>#sh_open-diamond</styleUrl>
		</Pair>
	</StyleMap>
	<Style id="sn_open-diamond7">
		<IconStyle>
			<color>ff0000ff</color>
			<scale>1.2</scale>
			<Icon>
				<href>http://maps.google.com/mapfiles/kml/shapes/open-diamond.png</href>
			</Icon>
		</IconStyle>
		<LabelStyle>
			<color>ff0000ff</color>
		</LabelStyle>
	</Style>
	<StyleMap id="msn_open-diamond29">
		<Pair>
			<key>normal</key>
			<styleUrl>#sn_open-diamond00</styleUrl>
		</Pair>
		<Pair>
			<key>highlight</key>
			<styleUrl>#sh_open-diamond12</styleUrl>
		</Pair>
	</StyleMap>
	<StyleMap id="msn_open-diamond8">
		<Pair>
			<key>normal</key>
			<styleUrl>#sn_open-diamond1</styleUrl>
		</Pair>
		<Pair>
			<key>highlight</key>
			<styleUrl>#sh_open-diamond0</styleUrl>
		</Pair>
	</StyleMap>
	<Style id="sn_open-diamond141">
		<IconStyle>
			<color>ff00ffff</color>
			<scale>1.2</scale>
			<Icon>
				<href>http://maps.google.com/mapfiles/kml/shapes/open-diamond.png</href>
			</Icon>
		</IconStyle>
		<LabelStyle>
			<color>ff00ffff</color>
		</LabelStyle>
	</Style>
	<Style id="sh_open-diamond0">
		<IconStyle>
			<color>ffff5500</color>
			<scale>1.4</scale>
			<Icon>
				<href>http://maps.google.com/mapfiles/kml/shapes/open-diamond.png</href>
			</Icon>
		</IconStyle>
		<LabelStyle>
			<color>ffff5500</color>
		</LabelStyle>
	</Style>
	<Style id="sh_open-diamond9">
		<IconStyle>
			<color>ff0000ff</color>
			<scale>1.4</scale>
			<Icon>
				<href>http://maps.google.com/mapfiles/kml/shapes/open-diamond.png</href>
			</Icon>
		</IconStyle>
		<LabelStyle>
			<color>ff0000ff</color>
		</LabelStyle>
	</Style>
	<Style id="sn_open-diamond21">
		<IconStyle>
			<color>ff00ff55</color>
			<scale>1.2</scale>
			<Icon>
				<href>http://maps.google.com/mapfiles/kml/shapes/open-diamond.png</href>
			</Icon>
		</IconStyle>
		<LabelStyle>
			<color>ff00ff55</color>
		</LabelStyle>
	</Style>
	<Style id="sh_open-diamond7">
		<IconStyle>
			<color>ff00ffff</color>
			<scale>1.4</scale>
			<Icon>
				<href>http://maps.google.com/mapfiles/kml/shapes/open-diamond.png</href>
			</Icon>
		</IconStyle>
		<LabelStyle>
			<color>ff00ffff</color>
		</LabelStyle>
	</Style>
	<StyleMap id="msn_open-diamond28">
		<Pair>
			<key>normal</key>
			<styleUrl>#sn_open-diamond41</styleUrl>
		</Pair>
		<Pair>
			<key>highlight</key>
			<styleUrl>#sh_open-diamond19</styleUrl>
		</Pair>
	</StyleMap>
	<Style id="sh_open-diamond17">
		<IconStyle>
			<color>ff00ff00</color>
			<scale>1.4</scale>
			<Icon>
				<href>http://maps.google.com/mapfiles/kml/shapes/open-diamond.png</href>
			</Icon>
		</IconStyle>
		<LabelStyle>
			<color>ff00ff00</color>
		</LabelStyle>
	</Style>
	<Style id="sn_open-diamond00">
		<IconStyle>
			<color>ff00ffff</color>
			<scale>1.2</scale>
			<Icon>
				<href>http://maps.google.com/mapfiles/kml/shapes/open-diamond.png</href>
			</Icon>
		</IconStyle>
		<LabelStyle>
			<color>ff00ffff</color>
		</LabelStyle>
	</Style>
	<Style id="sn_open-diamond40">
		<IconStyle>
			<color>ff0000ff</color>
			<scale>1.2</scale>
			<Icon>
				<href>http://maps.google.com/mapfiles/kml/shapes/open-diamond.png</href>
			</Icon>
		</IconStyle>
		<LabelStyle>
			<color>ff0000ff</color>
		</LabelStyle>
	</Style>
	<StyleMap id="msn_open-diamond20">
		<Pair>
			<key>normal</key>
			<styleUrl>#sn_open-diamond10</styleUrl>
		</Pair>
		<Pair>
			<key>highlight</key>
			<styleUrl>#sh_open-diamond8</styleUrl>
		</Pair>
	</StyleMap>
	<Style id="sh_open-diamond25">
		<IconStyle>
			<color>ff00ffff</color>
			<scale>1.4</scale>
			<Icon>
				<href>http://maps.google.com/mapfiles/kml/shapes/open-diamond.png</href>
			</Icon>
		</IconStyle>
		<LabelStyle>
			<color>ff00ffff</color>
		</LabelStyle>
	</Style>
	<Folder>
		<name>Specimen Localities</name>
		<description>This folder contains two subfolders: Alberta specimen localities, and Alberta and Montana landmarks. Note: Fossils in Alberta are protected under the Historical Resources Act, which prohibits the excavation of fossils without a permit, and prohibits surface collection within provincial and national parks and protected areas. For more information on the Historical Resources Act, visit the Alberta Queen’s Printer website, http://www.qp.alberta.ca/index.cfm. 

Specimens have been located as accurately as possible given current locality information provided in Table S1. Locality accuracy is colour coded as follows: red – only a general region is known, e.g. Little Sandhill Creek; yellow – based entirely on field notes, which usually give distances in miles from a particular landmark; blue – Township and Range coordinates; green – GPS coordinates. NHMUK R5161 is marked in purple because it is uncertain whether or not this is the correct quarry for this specimen. Localities within Dinosaur Provincial Park were also cross-checked against an overlay of the Steveville Map 969A (Sternberg 1950).</description>
		<Folder>
			<name>Albertan specimens</name>
			<open>1</open>
			<description>This folder contains placemarks for ankylosaur specimens found in Alberta.</description>
			<gx:balloonVisibility>1</gx:balloonVisibility>
			<Placemark>
				<name>AMNH 5211</name>
				<description>Estimate only.

B. Brown, P. Kaisen, 1910. Tail club

“No. 11 Ankylosaurus caudal plate same locality + level as no. 12”
“No. 12 Trachodon left scapula 50 feet above river 1 ½ mile above Tolman’s”	

AMNH Collections Database; AMNH Vertebrate Paleontology Archives: Barnum Brown 1908-1911 Notebook</description>
				<LookAt>
					<longitude>-113.013101742396</longitude>
					<latitude>51.84575762323881</latitude>
					<altitude>0</altitude>
					<heading>-0.02204441752782731</heading>
					<tilt>0</tilt>
					<range>6170.557326488689</range>
					<gx:altitudeMode>relativeToSeaFloor</gx:altitudeMode>
				</LookAt>
				<styleUrl>#msn_open-diamond14</styleUrl>
				<Point>
					<coordinates>-113.0280636459221,51.85343986273259,0</coordinates>
				</Point>
			</Placemark>
			<Placemark>
				<name>AMNH 5216</name>
				<description>Estimate only.

B. Brown, P. Kaisen, 1911. Tail club.

½ mile above Tolman Ferry, left bank
“No. 18 = Ankylosaur tail section with plate 30 ft above river Tolman Ferry”  	

AMNH Vertebrate Paleontology Archives: Barnum Brown 1908-1911 Notebook</description>
				<LookAt>
					<longitude>-113.0113265456907</longitude>
					<latitude>51.84438531469436</latitude>
					<altitude>0</altitude>
					<heading>2.328068693866539</heading>
					<tilt>0</tilt>
					<range>1697.141660328725</range>
					<gx:altitudeMode>relativeToSeaFloor</gx:altitudeMode>
				</LookAt>
				<styleUrl>#msn_open-diamond14</styleUrl>
				<Point>
					<coordinates>-113.0157469893206,51.84590907943393,0</coordinates>
				</Point>
			</Placemark>
			<Placemark>
				<name>AMNH 5223</name>
				<description>B. Brown, P. Kaisen. Skull.l


Tolman Ferry 2 mi. below AB
Alberta, Canada, North America, Right bank. Red Deer River


AMNH online collections database.</description>
				<LookAt>
					<longitude>-112.9963741042697</longitude>
					<latitude>51.82184146238573</latitude>
					<altitude>0</altitude>
					<heading>-0.00889996918170451</heading>
					<tilt>0</tilt>
					<range>6232.555949908315</range>
					<gx:altitudeMode>relativeToSeaFloor</gx:altitudeMode>
				</LookAt>
				<styleUrl>#msn_open-diamond14</styleUrl>
				<Point>
					<coordinates>-112.9872523885916,51.81307688472136,0</coordinates>
				</Point>
			</Placemark>
			<Placemark>
				<name>AMNH 5266</name>
				<description>Estimate only.

B. Brown, P. Kaisen, Sternberg, Olsen, 1912. Juvenile postcrania.

10 mi. below Tolman Ferry, right bank 150 feet above the river; ?Section 32 T31 R21	

Specimen cards; AMNH Collections Database; AMNH Vertebrate Paleontology Archives: Barnum Brown 1908-1911 Notebook</description>
				<LookAt>
					<longitude>-112.9309506695982</longitude>
					<latitude>51.69846842015215</latitude>
					<altitude>0</altitude>
					<heading>2.391379465025127</heading>
					<tilt>0</tilt>
					<range>2347.66289580232</range>
					<gx:altitudeMode>relativeToSeaFloor</gx:altitudeMode>
				</LookAt>
				<styleUrl>#msn_open-diamond200</styleUrl>
				<Point>
					<coordinates>-112.9371472266612,51.69947424451567,0</coordinates>
				</Point>
			</Placemark>
			<Placemark>
				<name>AMNH 5238</name>
				<description>Exact locality unknown. Partial skull.

B. Brown, 1911	

Near mouth of Berry Creek

AMNH Collections Database; AMNH Vertebrate Paleontology Archives: Barnum Brown 1908-1911 Notebook	


This is probably in the Steveville region of Dinosaur Provincial Park.</description>
				<LookAt>
					<longitude>-111.5907012037284</longitude>
					<latitude>50.832285606287</latitude>
					<altitude>0</altitude>
					<heading>3.434546574373298</heading>
					<tilt>0</tilt>
					<range>6902.388859284846</range>
					<gx:altitudeMode>relativeToSeaFloor</gx:altitudeMode>
				</LookAt>
				<styleUrl>#msn_open-diamond18</styleUrl>
				<Point>
					<gx:altitudeMode>clampToSeaFloor</gx:altitudeMode>
					<coordinates>-111.5839354496775,50.83787781395554,0</coordinates>
				</Point>
			</Placemark>
			<Placemark>
				<name>AMNH 5245</name>
				<description>Brown, Kaisen, Olsen, and Sternberg. Tail club.

3 ½ mi below Tolman Ferry, right bank 100 feet above the river.

AMNH Online collections database.</description>
				<LookAt>
					<longitude>-112.9848977802498</longitude>
					<latitude>51.81727756163399</latitude>
					<altitude>0</altitude>
					<heading>0.000119446929972536</heading>
					<tilt>0</tilt>
					<range>6231.608318377024</range>
					<gx:altitudeMode>relativeToSeaFloor</gx:altitudeMode>
				</LookAt>
				<styleUrl>#msn_open-diamond14</styleUrl>
				<Point>
					<coordinates>-112.9699938534361,51.79592189593296,0</coordinates>
				</Point>
			</Placemark>
			<Placemark>
				<name>AMNH 5337</name>
				<description>Estimate only, see note below:

B. Brown, P. Kaisen, 1914. Skull and partial postcrania.	

Sand Creek, right bank 125 feet above river 12 mi. below Steveville Red Deer River

AMNH Collections Database


A note added 15 Sept 2011: AMNH 5404 has both field note data and data in the DPP book. These do not agree, and AMNH 5404 seems to be more like 6 mi downstream of Steveville rather than 12 mi. AMNH 5337 is supposedly on Sand Creek which, if this is the same as Little Sandhill Creek, is more like 6 mi downstream and not 12.</description>
				<LookAt>
					<longitude>-111.5126334433779</longitude>
					<latitude>50.75577296935698</latitude>
					<altitude>0</altitude>
					<heading>-0.4108492500323664</heading>
					<tilt>1.532004842184254</tilt>
					<range>3032.614042456402</range>
					<gx:altitudeMode>relativeToSeaFloor</gx:altitudeMode>
				</LookAt>
				<styleUrl>#msn_open-diamond29</styleUrl>
				<Point>
					<gx:altitudeMode>clampToSeaFloor</gx:altitudeMode>
					<coordinates>-111.5155103850438,50.75271373583524,0</coordinates>
				</Point>
			</Placemark>
			<Placemark>
				<name>AMNH 5403</name>
				<description>Estimate only. Skull and partial postcrania.

B. Brown, P. Kaisen, 1913	

Steveville 1 ½ mi. below, left bank 40 feet above river	

AMNH Collections Database</description>
				<LookAt>
					<longitude>-111.6004073150595</longitude>
					<latitude>50.8185490883759</latitude>
					<altitude>0</altitude>
					<heading>-0.4782450738394135</heading>
					<tilt>1.32673522832854</tilt>
					<range>2134.919145219519</range>
					<gx:altitudeMode>relativeToSeaFloor</gx:altitudeMode>
				</LookAt>
				<styleUrl>#msn_open-diamond10</styleUrl>
				<Point>
					<coordinates>-111.6029965443566,50.81600014898236,0</coordinates>
				</Point>
			</Placemark>
			<Placemark>
				<name>AMNH5404</name>
				<description>See note below regarding accuracy.

B. Brown, P. Kaisen, 1913. Skull and partial postcrania.	

Steveville 12 mi. below, right bank 75 feet above river 

Sternberg Map #60

UTM NAD83
E464501.570, N5623591.470	

AMNH Collections Database; Currie and Koppelhus (2005) supplementary CD ROM; Sternberg 1950


Note: AMNH 5404 has both field note data and GPS coordinates do not agree. AMNH 5404 seems to be more like 6 mi downstream of Steveville rather than 12 mi, using GPS data. The coordinates plotted here use the GPS coordinates in Currie and Koppelhus (2005).


Also of note: This quarry locality is accessible to visitors to Dinosaur Provincial Park and can be accessed on the &quot;Trail of the Fossil Hunters&quot; hiking path.</description>
				<LookAt>
					<longitude>-111.4607212515794</longitude>
					<latitude>50.78522363160508</latitude>
					<altitude>0</altitude>
					<heading>-1.174534199672309</heading>
					<tilt>0</tilt>
					<range>25669.3484185642</range>
					<gx:altitudeMode>relativeToSeaFloor</gx:altitudeMode>
				</LookAt>
				<styleUrl>#msn_open-diamond25</styleUrl>
				<Point>
					<coordinates>-111.5033442366542,50.76300084969989,0</coordinates>
				</Point>
			</Placemark>
			<Placemark>
				<name>AMNH 5404</name>
				<description>Steveville 12 mi. below AB
Alberta, Canada, North America, right bank 40 feet above river Red Deer River

From AMNH online collections info


A note added 15 Sept 2011: AMNH 5404 has both field note data and data in the DPP book. These do not agree, and AMNH 5404 seems to be more like 6 mi downstream of Steveville rather than 12 mi. AMNH 5337 is supposedly on Sand Creek which is like 6 mi downstream and not 12. So, AMNH field notes may be inaccurate with regards to Steveville. Will need to discuss with Phil.</description>
				<LookAt>
					<longitude>-111.4421156382143</longitude>
					<latitude>50.75899323106333</latitude>
					<altitude>0</altitude>
					<heading>0.1277064302380912</heading>
					<tilt>0</tilt>
					<range>5305.829489160318</range>
					<gx:altitudeMode>relativeToSeaFloor</gx:altitudeMode>
				</LookAt>
				<styleUrl>#msn_open-diamond120</styleUrl>
				<Point>
					<gx:altitudeMode>clampToSeaFloor</gx:altitudeMode>
					<coordinates>-111.4363636608001,50.75252413198384,0</coordinates>
				</Point>
			</Placemark>
			<Placemark>
				<name>AMNH 5405</name>
				<description>Estimate only, see note below regarding accuracy.

B. Brown, P. Kaisen. Skull and partial postcrania.	

Steveville 12 mi., right bank 75 feet above river 		

AMNH Collections Database


Note: Because there is conflicting data for the placement of AMNH 5404, which is also supposedly 12 mi below Steveville, the placement of AMNH 5405 may be uncertain.</description>
				<LookAt>
					<longitude>-111.5029558579375</longitude>
					<latitude>50.76441462245451</latitude>
					<altitude>0</altitude>
					<heading>3.500586437877653</heading>
					<tilt>0</tilt>
					<range>890.7014507165413</range>
					<gx:altitudeMode>relativeToSeaFloor</gx:altitudeMode>
				</LookAt>
				<styleUrl>#msn_open-diamond29</styleUrl>
				<Point>
					<gx:altitudeMode>clampToSeaFloor</gx:altitudeMode>
					<coordinates>-111.5016617994458,50.76345774514494,0</coordinates>
				</Point>
			</Placemark>
			<Placemark>
				<name>AMNH 5406</name>
				<description>Estimate only.

B. Brown, P. Kaisen. Cervical half ring, other postcrania.

Steveville 1 mi. below, left side 75 feet above river	

AMNH Collections Database</description>
				<LookAt>
					<longitude>-111.5924818615469</longitude>
					<latitude>50.8261330261933</latitude>
					<altitude>0</altitude>
					<heading>0.8204569497455923</heading>
					<tilt>0</tilt>
					<range>2431.418892859766</range>
					<gx:altitudeMode>relativeToSeaFloor</gx:altitudeMode>
				</LookAt>
				<styleUrl>#msn_open-diamond30</styleUrl>
				<Point>
					<coordinates>-111.5972479194409,50.82382654153156,0</coordinates>
				</Point>
			</Placemark>
			<Placemark>
				<name>AMNH5409</name>
				<description>B. Brown, P. Kaisen. Pelvis.

Steveville 1 ½ mi. below, left bank 20 feet above river

Sternberg Map #7

UTM NAD83
E457353.919, N5629594.606	


AMNH Collections Database; Currie and Koppelhus (2005) supplementary CD ROM; Sternberg 1950</description>
				<LookAt>
					<longitude>-111.4607212515794</longitude>
					<latitude>50.78522363160508</latitude>
					<altitude>0</altitude>
					<heading>-1.174534199672309</heading>
					<tilt>0</tilt>
					<range>25669.3484185642</range>
					<gx:altitudeMode>relativeToSeaFloor</gx:altitudeMode>
				</LookAt>
				<styleUrl>#msn_open-diamond33</styleUrl>
				<Point>
					<coordinates>-111.6053878172671,50.81650036055486,0</coordinates>
				</Point>
			</Placemark>
			<Placemark>
				<name>CMN 135</name>
				<description>Very rough estimate only.


CM Sternberg 10 June 1919. Tail club knob.

“...southwest extremity of badlands near prairie level, south branch of Little Sandhill Creek.”	

Specimen card; CH Sternberg field notes 1919</description>
				<LookAt>
					<longitude>-111.5713052358172</longitude>
					<latitude>50.75176352064225</latitude>
					<altitude>0</altitude>
					<heading>3.447673465776763</heading>
					<tilt>0</tilt>
					<range>2484.996037778622</range>
					<gx:altitudeMode>relativeToSeaFloor</gx:altitudeMode>
				</LookAt>
				<styleUrl>#msn_open-diamond32</styleUrl>
				<Point>
					<coordinates>-111.5713100676791,50.75176127608566,0</coordinates>
				</Point>
			</Placemark>
			<Placemark>
				<name>CMN 210</name>
				<description>Exact locality unknown.

L.M. Lambe, 1897-08-18. Holotype of Euoplocephalus tutus; skull roof and first cervical half ring.

East side of Red Deer River at mouth of Berry Creek

Data provided by M. Currie, CMN</description>
				<LookAt>
					<longitude>-111.583874689739</longitude>
					<latitude>50.82707799730429</latitude>
					<altitude>0</altitude>
					<heading>3.43793910735062</heading>
					<tilt>0</tilt>
					<range>6699.823166222577</range>
					<gx:altitudeMode>relativeToSeaFloor</gx:altitudeMode>
				</LookAt>
				<styleUrl>#msn_open-diamond24</styleUrl>
				<Point>
					<coordinates>-111.5835241518202,50.84020002495755,0</coordinates>
				</Point>
			</Placemark>
			<Placemark>
				<name>CMN 349</name>
				<description>Exact locality unknown

C.H. Sternberg; 13 June 1914. Tail club.

“… south side of Red Deer River, three miles above “Happy Jack Ferry” (Belly River Fm., Dead Lodge Canyon).

Data provided by M. Currie, CMN.</description>
				<LookAt>
					<longitude>-111.4558359035028</longitude>
					<latitude>50.77524545285512</latitude>
					<altitude>0</altitude>
					<heading>-0.1184035837638164</heading>
					<tilt>0</tilt>
					<range>10100.36630792277</range>
					<gx:altitudeMode>relativeToSeaFloor</gx:altitudeMode>
				</LookAt>
				<styleUrl>#msn_open-diamond11</styleUrl>
				<Point>
					<coordinates>-111.4828258414786,50.76151383176447,0</coordinates>
				</Point>
			</Placemark>
			<Placemark>
				<name>CMN 2252</name>
				<description>Exact locality unknown.

C.H. Sternberg; 1914. Partial tail club knob.

Sticker on specimen reads 1914-5; “Section of club...Sand Creek”

CH Sternberg field notes 1914</description>
				<LookAt>
					<longitude>-111.5275744499002</longitude>
					<latitude>50.7524295524907</latitude>
					<altitude>0</altitude>
					<heading>3.481620937651686</heading>
					<tilt>0</tilt>
					<range>7135.647915257217</range>
					<gx:altitudeMode>relativeToSeaFloor</gx:altitudeMode>
				</LookAt>
				<styleUrl>#msn_open-diamond32</styleUrl>
				<Point>
					<coordinates>-111.540861744882,50.74941541004938,0</coordinates>
				</Point>
			</Placemark>
			<Placemark>
				<name>CMN8530</name>
				<description>Estimate only.

CM Sternberg 1916. Holotype of Anodontosaurus lambei; skull, first cervical half ring, other postcrania.

&quot;It was collected by G.F. Sternberg in 1916, from the Edmonton formation, 90 feet above Red Deer river, in sec. 3, tp 21, range 31, W 4th prin. Mer. This locality is about 8 miles southwest of Morrin, Alberta, and the horizon is near the middle of the Edmonton beds. The specimen was preserved in a tenacious fine-grained sandstone which does not free well from some of the softer bones, particularly the under side of the skull and the roof of the mouth, thus making the preparation of this portion difficult.&quot; (Sternberg 1929:28)</description>
				<LookAt>
					<longitude>-112.8191816533029</longitude>
					<latitude>51.62969423500522</latitude>
					<altitude>0</altitude>
					<heading>-0.04410486003092846</heading>
					<tilt>0</tilt>
					<range>13286.82933372976</range>
					<gx:altitudeMode>relativeToSeaFloor</gx:altitudeMode>
				</LookAt>
				<styleUrl>#msn_open-diamond26</styleUrl>
				<Point>
					<coordinates>-112.8714723752875,51.62152125927534,0</coordinates>
				</Point>
			</Placemark>
			<Placemark>
				<name>CMN 8876</name>
				<description>CMN 8876 cf Euoplocephalus – skull lacking mandibles

(Field # 6-1937)

Discovered by Mr. H. Lowe NE of camp, June 22, 1937

13. 5 miles a little east of south of Manyberries. In SW1/4 of Section 20, T. 3, R. 5, west of 4th meridian. “In clay bed midway between two massive sandstone beds; below the middle of the
section exposed at this spot.”


Data provided by M. Currie, 2011/2012, CMN.</description>
				<LookAt>
					<longitude>-110.4774463651616</longitude>
					<latitude>49.3849360609366</latitude>
					<altitude>0</altitude>
					<heading>0.58343252841532</heading>
					<tilt>0</tilt>
					<range>137411.2717935566</range>
					<gx:altitudeMode>relativeToSeaFloor</gx:altitudeMode>
				</LookAt>
				<styleUrl>#msn_open-diamond34</styleUrl>
				<Point>
					<gx:altitudeMode>clampToSeaFloor</gx:altitudeMode>
					<coordinates>-110.6395794373043,49.21762420889336,0</coordinates>
				</Point>
			</Placemark>
			<Placemark>
				<name>MACN Pv 12554</name>
				<description>Estimate only.

L. Sternberg. Tail club.

“Specimen No 6
About four and a half feet of the tail and the tail club of a large armoured dinosaur. Found by L. Sternberg about a mile east of the River and a mile southeast of Steveville (100 feet above the river.) (Sent to Buenos Aires in an exchange.) Nodosauridae.”

ROM Field Notes 1926</description>
				<LookAt>
					<longitude>-111.5864718790537</longitude>
					<latitude>50.81979197559863</latitude>
					<altitude>0</altitude>
					<heading>-0.2039658551740496</heading>
					<tilt>0</tilt>
					<range>6529.96207541114</range>
					<gx:altitudeMode>relativeToSeaFloor</gx:altitudeMode>
				</LookAt>
				<styleUrl>#msn_open-diamond20</styleUrl>
				<Point>
					<coordinates>-111.5864322609743,50.82292815675761,0</coordinates>
				</Point>
			</Placemark>
			<Placemark>
				<name>NHMUK R5161</name>
				<description><![CDATA[WE Cutler. Holotype of Scolosaurus cutleri; complete skeleton with in situ osteoderms and skin impressions but lacking skull and tail club.

“Professor Parks of Toronto informed F. A. Bather, the Keeper of the Natural History Museum in London, that according to information gained from Mr. Levi Sternberg ,,it seems that the specimen was found in the Belly River Series, Upper Cretaceous, about one half mile below <<Happy Jack>> ferry on the Red Deer River. This would make the location in Dead Lodge Canyon...” Nopcsa (1928:54)

Sternberg Map #105

UTM NAD83
E471365.051, N5622321.978	


Nopsca (1928); Currie and Koppelhus (2005) supplementary CD ROM; Sternberg 1950]]></description>
				<LookAt>
					<longitude>-111.4607212515794</longitude>
					<latitude>50.78522363160508</latitude>
					<altitude>0</altitude>
					<heading>-1.174534199672309</heading>
					<tilt>0</tilt>
					<range>25669.3484185642</range>
					<gx:altitudeMode>relativeToSeaFloor</gx:altitudeMode>
				</LookAt>
				<styleUrl>#msn_open-diamond1</styleUrl>
				<Point>
					<coordinates>-111.4059229388423,50.75195958690372,0</coordinates>
				</Point>
			</Placemark>
			<Placemark>
				<name>ROM 784</name>
				<description>1919, L. Sternberg. Holotype of Dyoplosaurus acutosquameus; partial posterior skull roof, limb elements, pelvis, complete caudal series including tail club, in situ osteoderms.	

“1 mile south of river 2.5 miles up from Happy Jack Ferry.”

UTM NAD83
E466,786.580 N5,622,422.480

Sternberg Map #93	


ROM field notes; Currie and Koppelhus (2005) supplementary CD ROM; Sternberg 1950</description>
				<LookAt>
					<longitude>-111.521454226958</longitude>
					<latitude>50.73849618345095</latitude>
					<altitude>0</altitude>
					<heading>-1.221558883746193</heading>
					<tilt>0</tilt>
					<range>13476.60308530374</range>
					<gx:altitudeMode>relativeToSeaFloor</gx:altitudeMode>
				</LookAt>
				<styleUrl>#msn_open-diamond2</styleUrl>
				<Point>
					<coordinates>-111.4708406857916,50.75262385231099,0</coordinates>
				</Point>
			</Placemark>
			<Placemark>
				<name>ROM 788</name>
				<description>Estimate only.

L. Sternberg. Tail club.	

“Specimen No 9
Large tail club with about 4 feet of tendons in place. This was found about 1/2 mile south of Nos 1 &amp; 3. There are two sections, one with club and one with tendons. (Cat. No. 4973 ct old and 788 new number. Armoured, tail club, mounted in gallery.)”

--&gt; Specimen # 1 is Prosaurolophus maximus: “on a branch of the main Sand Hill Creek about 2 miles from the mouth (where it empties into the river) and about one mile northwest of the crown and about 125 feet above the river (aneroid).”
--&gt; Specimen # 2 is Prosaurolophus in same quarry as #1: “West branch, Sand Creek, 150 feet below prairie level, 125 feet up. …Topographic map No. 79, Sec. 32, Tp. 20 R. 11 west of the fourth.”	


ROM Field Notes 1921</description>
				<LookAt>
					<longitude>-111.5119674658393</longitude>
					<latitude>50.74442513966305</latitude>
					<altitude>0</altitude>
					<heading>-0.146269026327099</heading>
					<tilt>0</tilt>
					<range>2792.87053715925</range>
					<gx:altitudeMode>relativeToSeaFloor</gx:altitudeMode>
				</LookAt>
				<styleUrl>#msn_open-diamond9</styleUrl>
				<Point>
					<coordinates>-111.501626354779,50.74555293614181,0</coordinates>
				</Point>
			</Placemark>
			<Placemark>
				<name>ROM 813</name>
				<description>L. Sternberg 1919. Partial skeleton with in situ osteoderms and skin impressions.

 “This specimen is a plated fellow. Found about one-half mile north west of Jackson&apos;s Ranch, just below a large, sharp point or butte, 100 feet above the river level (aneroid)”

Sternberg Map #103

UTM NAD83
E470035.390, N5623289.679	


ROM Field Notes; Currie and Koppelhus (2005) supplementary CD ROM; Sternberg (1950)</description>
				<LookAt>
					<longitude>-111.4330754990231</longitude>
					<latitude>50.74549332771827</latitude>
					<altitude>0</altitude>
					<heading>-1.153175146442737</heading>
					<tilt>0</tilt>
					<range>25662.6535497745</range>
					<gx:altitudeMode>relativeToSeaFloor</gx:altitudeMode>
				</LookAt>
				<styleUrl>#msn_open-diamond2</styleUrl>
				<Point>
					<coordinates>-111.4248549628284,50.76059730856886,0</coordinates>
				</Point>
			</Placemark>
			<Placemark>
				<name>ROM 832</name>
				<description>Estimate only.

GF Sternberg 1916. Partial skull.

Probably:  “Found by G.F. Sternberg, opposite Neal’s ranch, sec. 10, T. 31, R. 21…Found 7 miles southwest of Morrin, about 75 feet above the water. This is the skull and first ring of plates. The ring of plates is complete and the back part of the skull is complete, but the front part is all broken up though I have all fragments...The top is preserved the best as it lay upside down.”

GF Sternberg Field Notes 1916

Exchanged with ROM, March 1930</description>
				<LookAt>
					<longitude>-111.3623274776715</longitude>
					<latitude>50.75305582375616</latitude>
					<altitude>0</altitude>
					<heading>-0.04600462203520222</heading>
					<tilt>0</tilt>
					<range>7422.468862279991</range>
					<gx:altitudeMode>relativeToSeaFloor</gx:altitudeMode>
				</LookAt>
				<styleUrl>#msn_open-diamond</styleUrl>
				<Point>
					<coordinates>-112.8899871672519,51.6363232469711,0</coordinates>
				</Point>
			</Placemark>
			<Placemark>
				<name>ROM 1930</name>
				<description>Sternberg 1914, skull and partial postcrania.
Originally collected for GSC/CMN, traded to ROM for Styracosaurus skeleton.


Currie and Koppelhus (2005) include coordinates for a specimen called ROM 2162 (“scattered skeleton”), collected by CH Sternberg in 1914, however, there does not appear to be a specimen ROM 2162. The only ankylosaur collected by CH Sternberg in 1914 was ROM 1930, which was also a scattered skeleton. The GPS coordinates correspond well to an estimate made using only the field notes, and so it is highly likely that “ROM 2162” is actually ROM 1930.


GF Sternberg 1914
“This specimen is about 60’ below the coal seam and 250’ above the river.”
“Stegoasur Europlocephalus [sic] GHS. About 15 feet of body including head. Sacrum Pelvis arch limbs a few feet of the tail. Evidently the entire skeleton except tail ____? On south side river about 3 miles below “Happy Jack Ferry” Preserved in hard grey sand stone concretion covering a floor about 15 x 20 ft. and 35 ft. high at back end of quarry. The most difficult specimen we ever collected.”

Possibly the same as ROM 2162 in Currie and Koppelhus (2005): UTM NAD83
E474519.970, N5624073.730

Sternberg Map #112	

CH. Sternberg Field Notes 1914 (GSC/CMN); Currie and Koppelhus (2005) supplementary CD ROM; Sternberg (1950)</description>
				<LookAt>
					<longitude>-111.3886576514033</longitude>
					<latitude>50.74156497441088</latitude>
					<altitude>0</altitude>
					<heading>-1.118782891230211</heading>
					<tilt>0</tilt>
					<range>13403.8604316428</range>
					<gx:altitudeMode>relativeToSeaFloor</gx:altitudeMode>
				</LookAt>
				<styleUrl>#msn_open-diamond7</styleUrl>
				<Point>
					<coordinates>-111.3613349008164,50.76786183064312,0</coordinates>
				</Point>
			</Placemark>
			<Placemark>
				<name>TMP 1982.9.3</name>
				<description>Pelvis, femur, dorsal vertebrae, fragments of cervical half ring.

&quot;Fox Coulee; LSD 14-16-29-20W4; record says Midland Prov Pk, but location is Fox Coulee, east of tracks close to Fox Coulee BB&quot;

Eberth pers. comm. 3 Oct 2012</description>
				<LookAt>
					<longitude>-113.2638561734884</longitude>
					<latitude>51.70672196266049</latitude>
					<altitude>0</altitude>
					<heading>-1.361622525654871e-007</heading>
					<tilt>0</tilt>
					<range>467141.538610234</range>
					<gx:altitudeMode>relativeToSeaFloor</gx:altitudeMode>
				</LookAt>
				<styleUrl>#msn_open-diamond8</styleUrl>
				<Point>
					<coordinates>-112.7621445763367,51.4869125531624,0</coordinates>
				</Point>
			</Placemark>
			<Placemark>
				<name>TMP 1983.36.120</name>
				<description>Tail club.

M04
R11W
T020N
S32

TMP Online Collections Database.</description>
				<LookAt>
					<longitude>-111.3501190404714</longitude>
					<latitude>50.77479301138497</latitude>
					<altitude>0</altitude>
					<heading>1.077703826003644</heading>
					<tilt>0</tilt>
					<range>8375.860722094296</range>
					<gx:altitudeMode>relativeToSeaFloor</gx:altitudeMode>
				</LookAt>
				<styleUrl>#msn_open-diamond28</styleUrl>
				<Point>
					<coordinates>-111.4847125419989,50.73414943769372,0</coordinates>
				</Point>
			</Placemark>
			<Placemark>
				<name>TMP1994.168.1</name>
				<description>Kurt Armbruster, TMP crew. Tail club.

Bleriot Ferry, Drumheller Valley

Horsethief Canyon, northern portion, along trail to TMP Day Digs bonebed excavation	

Specimen card; Pers. comm. D. Eberth October 2012</description>
				<LookAt>
					<longitude>-112.8618396596523</longitude>
					<latitude>51.54930199164875</latitude>
					<altitude>0</altitude>
					<heading>0.05219125390403851</heading>
					<tilt>0</tilt>
					<range>6126.278300965239</range>
					<gx:altitudeMode>relativeToSeaFloor</gx:altitudeMode>
				</LookAt>
				<styleUrl>#msn_open-diamond41</styleUrl>
				<Point>
					<coordinates>-112.8757050886497,51.54581615274548,0</coordinates>
				</Point>
			</Placemark>
			<Placemark>
				<name>TMP1996.75.01</name>
				<description>Skull, cervical half ring fragments

Three Hills Locality

&quot;LSD15 S16-20-22W4; 
12U; 359,755; 5,714,550 (WGS 84)
Three Hills Creek downstream from HWY 836 intersection w creek&quot; D. Eberth pers. comm. 3 Oct 2012

TMP collections database, B. Strilisky pers. comm. July 2012</description>
				<LookAt>
					<longitude>-112.7988531718385</longitude>
					<latitude>51.34292525282214</latitude>
					<altitude>0</altitude>
					<heading>-1.706538539561678</heading>
					<tilt>0</tilt>
					<range>121633.0208032379</range>
					<gx:altitudeMode>relativeToSeaFloor</gx:altitudeMode>
				</LookAt>
				<styleUrl>#msn_grn-pushpin</styleUrl>
				<Point>
					<coordinates>-113.0234058726736,51.56456655059075,0</coordinates>
				</Point>
			</Placemark>
			<Placemark>
				<name>TMP1997.59.1</name>
				<description>Estimate only.

Rosebud Creek
S12 T027N R22W 04
=363200.00 m E
5683566.00 m N

Skull.


12; 362,800; 5,684,000</description>
				<LookAt>
					<longitude>-109.7620407549951</longitude>
					<latitude>50.57773340566995</latitude>
					<altitude>0</altitude>
					<heading>0.6227122744598004</heading>
					<tilt>0</tilt>
					<range>207353.7117048762</range>
					<gx:altitudeMode>relativeToSeaFloor</gx:altitudeMode>
				</LookAt>
				<styleUrl>#msn_open-diamond16</styleUrl>
				<Point>
					<coordinates>-112.967670492743,51.29077801197351,0</coordinates>
				</Point>
			</Placemark>
			<Placemark>
				<name>TMP 1991.127.1</name>
				<description>457,876.822	5,630,232.048	666.058

TMP collections database</description>
				<LookAt>
					<longitude>-110.9550381340772</longitude>
					<latitude>2.098113540640286</latitude>
					<altitude>0</altitude>
					<heading>24.16843935401955</heading>
					<tilt>0</tilt>
					<range>2621149.872738293</range>
					<gx:altitudeMode>relativeToSeaFloor</gx:altitudeMode>
				</LookAt>
				<styleUrl>#msn_open-diamond19</styleUrl>
				<Point>
					<coordinates>-111.5980373738195,50.8222757238851,0</coordinates>
				</Point>
			</Placemark>
			<Placemark>
				<name>TMP 1997.132.1</name>
				<description>Skull, cervical half rings, partial postcrania.

TMP collections database.


TMP 1997.132.01


from David Eberth David.Eberth@gov.ab.ca to Victoria Arbour
date Fri, Jul 15, 2011 at 9:35 AM 
subject RE: Geology of the Hilda area 

Hi Victoria, 

The specimen you refer to was collected by our team in 1997 while we were mapping and documenting the centrosaurine megabonebed in that same area (Eberth et al. 2010). The ankylosaur excavation was headed up by Matt Vickaryous. The ankylosaur was collected from an iron-rich channel sandstone ~30m above the Oldman/Dinosaur Park contact (~10 m above the mega-bonebed horizon). The Dinosaur Park Formation in this area is a total of ~60 m thick. It becomes quite muddy in its upper half. The ankylosaur thus occurs in the middle of the DPFm in this area. On well logs, this strat position appears to correlate roughly with the middle of the DPFm at Dinosaur Provincial Park. In turn, this has always suggested to me that this ankylosaur may be a component of Ryan and Evan&apos;s Styracosaur-Lambeosaur-C. belli &apos;faunal zone&apos; (documented at the Park). Of course this hypothesis could be tested further by comparing ankylosaurs from higher in the section at the Park (&gt;25 m above the base of the DPFm) with the Hilda specimen. However, this could be difficult...off the top of my head, I would argue that the most recent collections of ankylosaur material from the Park (last 20 years) have come from the lowest 20 m of the DPFm; thus those specimens are part of the lower Centrosaurus-Corythosaurus faunal zone. This is all good speculative fun of course. Re the HCFm...Hilda is well beyond the erosional edge of HCFm and its equivalents...(check out a geologic map of Alberta). The beds at Hilda are ~76-75 Ma; the oldest fossiliferous HCFm beds in the Drumheller area are ~72 Ma. The exception to this, of course, is the Cypress Hills area which preserves a bit of the Eastend Fm (a paralic equivalent to the upper HCFm</description>
				<LookAt>
					<longitude>-112.4518667222557</longitude>
					<latitude>50.82745126676784</latitude>
					<altitude>0</altitude>
					<heading>-6.782921486183036</heading>
					<tilt>0</tilt>
					<range>310864.5224842054</range>
					<gx:altitudeMode>relativeToSeaFloor</gx:altitudeMode>
				</LookAt>
				<styleUrl>#msn_open-diamond40</styleUrl>
				<Point>
					<coordinates>-110.3883293895253,50.51437973364653,0</coordinates>
				</Point>
			</Placemark>
			<Placemark>
				<name>TMP 1998.93.65</name>
				<description>handle caudal
from TMP Hermis
M04
R11W
T020N
S31</description>
				<LookAt>
					<longitude>-111.4876827254288</longitude>
					<latitude>50.74750953386409</latitude>
					<altitude>0</altitude>
					<heading>0.9016128384852121</heading>
					<tilt>0</tilt>
					<range>17230.69077310838</range>
					<gx:altitudeMode>relativeToSeaFloor</gx:altitudeMode>
				</LookAt>
				<styleUrl>#msn_open-diamond13</styleUrl>
				<Point>
					<coordinates>-111.5078955260581,50.73415868282523,0</coordinates>
				</Point>
			</Placemark>
			<Placemark>
				<name>TMP 2000.57.3</name>
				<description>Onefour, Sage Creek
12; 546,114; 5,432,108	

Specimen card, TMP Collections Database


Tail club</description>
				<LookAt>
					<longitude>-111.5160008932473</longitude>
					<latitude>50.73570030975068</latitude>
					<altitude>0</altitude>
					<heading>0.9492304898097618</heading>
					<tilt>0</tilt>
					<range>5881.153026057313</range>
					<gx:altitudeMode>relativeToSeaFloor</gx:altitudeMode>
				</LookAt>
				<styleUrl>#msn_open-diamond25</styleUrl>
				<Point>
					<coordinates>-110.3690235090262,49.04012448487407,0</coordinates>
				</Point>
			</Placemark>
			<Placemark>
				<name>TMP 2003.12.166</name>
				<description>B. Bohdanowicz, 12 May 2003. ?Second cervical half ring.	

Dinosaur Provincial Park, Iddesleigh
12; 474069; 5623906	


Specimen card</description>
				<LookAt>
					<longitude>-112.060705178226</longitude>
					<latitude>51.17242056614754</latitude>
					<altitude>0</altitude>
					<heading>0.5256308375439811</heading>
					<tilt>0</tilt>
					<range>46430.76176548722</range>
					<gx:altitudeMode>relativeToSeaFloor</gx:altitudeMode>
				</LookAt>
				<styleUrl>#msn_open-diamond5</styleUrl>
				<Point>
					<coordinates>-111.3677042426973,50.76634011108373,0</coordinates>
				</Point>
			</Placemark>
			<Placemark>
				<name>TMP 2007.12.52</name>
				<description>Second cervical half ring.

M04 R11W T020N S32

TMP Collections Database.</description>
				<LookAt>
					<longitude>-111.5885117699259</longitude>
					<latitude>50.8272044031264</latitude>
					<altitude>0</altitude>
					<heading>8.812507562174544</heading>
					<tilt>0</tilt>
					<range>6207.285161455914</range>
					<gx:altitudeMode>relativeToSeaFloor</gx:altitudeMode>
				</LookAt>
				<styleUrl>#msn_open-diamond80</styleUrl>
				<Point>
					<coordinates>-111.4876363156815,50.73596282158809,0</coordinates>
				</Point>
			</Placemark>
			<Placemark>
				<name>UALVP 31</name>
				<description>GF Sternberg, 1921. Skull and partial postcrania.

¾ mile southeast of Steveville, 225 feet (aneroid) above the river (Gilmore 1923); GPS coordinates; Steveville #1

Sternberg Map #2

UTM NAD83
E458172.517, N5631004.186


Gilmore 1923, UALVP catalogue; Sternberg (1950); Currie and Koppelhus (2005), supplementary CD ROM</description>
				<LookAt>
					<longitude>-111.4330754990231</longitude>
					<latitude>50.74549332771827</latitude>
					<altitude>0</altitude>
					<heading>-1.153175146442737</heading>
					<tilt>0</tilt>
					<range>25662.6535497745</range>
					<gx:altitudeMode>relativeToSeaFloor</gx:altitudeMode>
				</LookAt>
				<styleUrl>#msn_open-diamond5</styleUrl>
				<Point>
					<coordinates>-111.5939233563682,50.82923923074322,0</coordinates>
				</Point>
			</Placemark>
			<Placemark>
				<name>UALVP 16247</name>
				<description>P Dodson, A. Lindoe, DW Krause, 1969. Tail club.

Dinosaur Provincial Park, Steveville #14 


Specimen display card; UALVP catalogue</description>
				<LookAt>
					<longitude>-111.5834941631926</longitude>
					<latitude>50.8367545207018</latitude>
					<altitude>0</altitude>
					<heading>1.339607989848009</heading>
					<tilt>0</tilt>
					<range>2879.564296685972</range>
					<gx:altitudeMode>relativeToSeaFloor</gx:altitudeMode>
				</LookAt>
				<styleUrl>#msn_open-diamond110</styleUrl>
				<Point>
					<coordinates>-111.583837789035,50.83688009668426,0</coordinates>
				</Point>
			</Placemark>
			<Placemark>
				<name>UALVP 45931</name>
				<description>set of half rings collected by L Lindoe near Hilda #1

Township/Range coordinates converted

LSD 13, S8, T18, R3, W4</description>
				<LookAt>
					<longitude>-110.0393091160699</longitude>
					<latitude>50.48592266869563</latitude>
					<altitude>0</altitude>
					<heading>2.533426546700804</heading>
					<tilt>0</tilt>
					<range>10866.6680568143</range>
					<gx:altitudeMode>relativeToSeaFloor</gx:altitudeMode>
				</LookAt>
				<styleUrl>#msn_open-diamond3</styleUrl>
				<Point>
					<coordinates>-110.3887105627031,50.50998398549882,0</coordinates>
				</Point>
			</Placemark>
			<Placemark>
				<name>UALVP 47273</name>
				<description>P. Bell, P. Currie, 15 July 2006. Tail club.

Dinosaur Provincial Park, Bonebed 91A


UALVP catalogue and field notes.</description>
				<LookAt>
					<longitude>-111.4531633099814</longitude>
					<latitude>50.78367107438795</latitude>
					<altitude>0</altitude>
					<heading>-1.168673160031906</heading>
					<tilt>0</tilt>
					<range>28318.47128307462</range>
					<gx:altitudeMode>relativeToSeaFloor</gx:altitudeMode>
				</LookAt>
				<styleUrl>#msn_open-diamond23</styleUrl>
				<Point>
					<coordinates>-111.5261093947987,50.73332251738234,0</coordinates>
				</Point>
			</Placemark>
			<Placemark>
				<name>UALVP 47977</name>
				<description>Exact locality unknown. Partial skull roof.


A. Lindoe, DW Krause

Dinosaur Provincial Park, “Happy Jack’s”


UALVP catalogue</description>
				<LookAt>
					<longitude>-111.4141320192776</longitude>
					<latitude>50.76204229120962</latitude>
					<altitude>0</altitude>
					<heading>1.470912842898001</heading>
					<tilt>0</tilt>
					<range>3333.875570190981</range>
					<gx:altitudeMode>relativeToSeaFloor</gx:altitudeMode>
				</LookAt>
				<styleUrl>#msn_open-diamond21</styleUrl>
				<Point>
					<coordinates>-111.4219862400642,50.77111144385658,0</coordinates>
				</Point>
			</Placemark>
			<Placemark>
				<name>UALVP 49314</name>
				<description>P. Bell

Dinosaur Provincial Park
12U 0463058
UTM 5619875

UALVP catalogue

Right prefrontal.</description>
				<LookAt>
					<longitude>-111.4486350517146</longitude>
					<latitude>50.7791548985892</latitude>
					<altitude>0</altitude>
					<heading>-1.165178414243916</heading>
					<tilt>0</tilt>
					<range>25653.03825452849</range>
					<gx:altitudeMode>relativeToSeaFloor</gx:altitudeMode>
				</LookAt>
				<styleUrl>#msn_open-diamond00</styleUrl>
				<Point>
					<coordinates>-111.5234110300969,50.72769605470504,0</coordinates>
				</Point>
			</Placemark>
			<Placemark>
				<name>USNM 10753</name>
				<description>GF Sternberg. Tail club.

7 miles W, 2 miles N of Morrin

Specimen card</description>
				<LookAt>
					<longitude>-112.8601147716775</longitude>
					<latitude>51.69071092270884</latitude>
					<altitude>0</altitude>
					<heading>-0.1509327559040129</heading>
					<tilt>0</tilt>
					<range>16958.64816303267</range>
					<gx:altitudeMode>relativeToSeaFloor</gx:altitudeMode>
				</LookAt>
				<styleUrl>#msn_open-diamond26</styleUrl>
				<Point>
					<gx:altitudeMode>clampToSeaFloor</gx:altitudeMode>
					<coordinates>-112.923077562289,51.68472378655633,0</coordinates>
				</Point>
			</Placemark>
			<Placemark>
				<name>Prosaurolophus Q004a</name>
				<description>465,134.310	5,621,076.240	694.577</description>
				<LookAt>
					<longitude>-111.5074399558551</longitude>
					<latitude>50.76266732566241</latitude>
					<altitude>0</altitude>
					<heading>-0.4087273716371749</heading>
					<tilt>3.215683208609369</tilt>
					<range>5394.61718794072</range>
					<gx:altitudeMode>relativeToSeaFloor</gx:altitudeMode>
				</LookAt>
				<styleUrl>#msn_open-diamond9</styleUrl>
				<Point>
					<gx:altitudeMode>clampToSeaFloor</gx:altitudeMode>
					<coordinates>-111.4941310577532,50.74042297423421,0</coordinates>
				</Point>
			</Placemark>
		</Folder>
		<Folder>
			<name>Alberta and Montana landmarks</name>
			<description>This folder contains placemarks for geographic features other than quarries, such as creeks, coulees, camps, ferry crossings, parks, trails, and towns.</description>
			<Placemark>
				<name>Blacktail Creek</name>
				<LookAt>
					<longitude>-112.5552154455989</longitude>
					<latitude>48.33797969833047</latitude>
					<altitude>0</altitude>
					<heading>0.5245048530528603</heading>
					<tilt>0</tilt>
					<range>15358.26415102811</range>
					<gx:altitudeMode>relativeToSeaFloor</gx:altitudeMode>
				</LookAt>
				<styleUrl>#msn_flag1</styleUrl>
				<Point>
					<coordinates>-112.5824443772551,48.34732450006384,0</coordinates>
				</Point>
			</Placemark>
			<Placemark>
				<name>Bleriot Ferry</name>
				<LookAt>
					<longitude>-112.884003076879</longitude>
					<latitude>51.56994927699974</latitude>
					<altitude>0</altitude>
					<heading>-0.1173196527062788</heading>
					<tilt>0</tilt>
					<range>3318.451388844692</range>
					<gx:altitudeMode>relativeToSeaFloor</gx:altitudeMode>
				</LookAt>
				<styleUrl>#msn_flag4</styleUrl>
				<Point>
					<coordinates>-112.8853970684468,51.57162280987354,0</coordinates>
				</Point>
			</Placemark>
			<Placemark>
				<name>Cut Bank</name>
				<LookAt>
					<longitude>-112.2739521528277</longitude>
					<latitude>48.55658672616494</latitude>
					<altitude>0</altitude>
					<heading>0.7348538511917945</heading>
					<tilt>0</tilt>
					<range>33854.92359765017</range>
					<gx:altitudeMode>relativeToSeaFloor</gx:altitudeMode>
				</LookAt>
				<styleUrl>#msn_flag1</styleUrl>
				<Point>
					<coordinates>-112.3278547297816,48.63306014811247,0</coordinates>
				</Point>
			</Placemark>
			<Placemark>
				<name>Dinosaur Provincial Park Lookoff</name>
				<LookAt>
					<longitude>-111.5260836518341</longitude>
					<latitude>50.75220550455763</latitude>
					<altitude>0</altitude>
					<heading>-0.2047744844734866</heading>
					<tilt>0</tilt>
					<range>733.8045494532508</range>
					<gx:altitudeMode>relativeToSeaFloor</gx:altitudeMode>
				</LookAt>
				<styleUrl>#msn_flag2</styleUrl>
				<Point>
					<coordinates>-111.5270478241906,50.75254525779513,0</coordinates>
				</Point>
			</Placemark>
			<Placemark>
				<name>Dinosaur Provincial Park Visitor Centre</name>
				<LookAt>
					<longitude>-111.5177577912145</longitude>
					<latitude>50.76003428581662</latitude>
					<altitude>0</altitude>
					<heading>0.5916008095328231</heading>
					<tilt>0</tilt>
					<range>785.8916812431521</range>
					<gx:altitudeMode>relativeToSeaFloor</gx:altitudeMode>
				</LookAt>
				<styleUrl>#msn_flag2</styleUrl>
				<Point>
					<coordinates>-111.5189573134665,50.75931726076616,0</coordinates>
				</Point>
			</Placemark>
			<Placemark>
				<name>Drumheller</name>
				<Camera>
					<longitude>-112.6900497072146</longitude>
					<latitude>51.45583702039652</latitude>
					<altitude>6688.530145438217</altitude>
					<heading>-63.92189089387556</heading>
					<tilt>0.01709194138221256</tilt>
					<roll>-63.15191641467862</roll>
					<gx:altitudeMode>relativeToSeaFloor</gx:altitudeMode>
				</Camera>
				<styleUrl>#msn_flag10</styleUrl>
				<Point>
					<coordinates>-112.7099777025759,51.46507740894938,0</coordinates>
				</Point>
			</Placemark>
			<Placemark>
				<name>Dry Island</name>
				<LookAt>
					<longitude>-113.0105574834118</longitude>
					<latitude>51.71309500592393</latitude>
					<altitude>0</altitude>
					<heading>1.302036710224914e-008</heading>
					<tilt>0</tilt>
					<range>72675.5226536383</range>
					<gx:altitudeMode>relativeToSeaFloor</gx:altitudeMode>
				</LookAt>
				<styleUrl>#msn_ylw-pushpin180</styleUrl>
				<Point>
					<coordinates>-112.9681611660426,51.95376712106026,0</coordinates>
				</Point>
			</Placemark>
			<Placemark>
				<name>Happy Jack Cabin</name>
				<description>Turf-covered abandoned farmstead occupied by &quot;Happy Jack&quot; Jackson from 1903 to 1942. Happy Jack operated a ferry here.

For more information on Happy Jack, see:

Archives Alberta: http://www.archivesalberta.org/diary/hermit.htm

and the Glenbow Museum:
http://ww2.glenbow.org/search/archivesPhotosSearch.aspx</description>
				<LookAt>
					<longitude>-111.4156699444478</longitude>
					<latitude>50.75788942356387</latitude>
					<altitude>0</altitude>
					<heading>-0.3297942092157615</heading>
					<tilt>1.455477537273233</tilt>
					<range>791.2781620528178</range>
					<gx:altitudeMode>relativeToSeaFloor</gx:altitudeMode>
				</LookAt>
				<styleUrl>#msn_flag2</styleUrl>
				<Point>
					<gx:altitudeMode>clampToSeaFloor</gx:altitudeMode>
					<coordinates>-111.4162019932847,50.75853315757637,0</coordinates>
				</Point>
			</Placemark>
			<Placemark>
				<name>Iddesleigh</name>
				<Camera>
					<longitude>-111.3670007228921</longitude>
					<latitude>50.7545089705921</latitude>
					<altitude>16749.66152759883</altitude>
					<heading>-48.14205760416687</heading>
					<tilt>0.020344261967241</tilt>
					<roll>-48.37280844000359</roll>
					<gx:altitudeMode>relativeToSeaFloor</gx:altitudeMode>
				</Camera>
				<styleUrl>#msn_flag2</styleUrl>
				<Point>
					<coordinates>-111.3016327149185,50.73447895456267,0</coordinates>
				</Point>
			</Placemark>
			<Placemark>
				<name>In Situ Hadrosaur Display</name>
				<LookAt>
					<longitude>-111.4996104783285</longitude>
					<latitude>50.76493263107279</latitude>
					<altitude>0</altitude>
					<heading>0.01404944881782356</heading>
					<tilt>4.107446104924844</tilt>
					<range>334.4418531971341</range>
					<gx:altitudeMode>relativeToSeaFloor</gx:altitudeMode>
				</LookAt>
				<styleUrl>#msn_flag2</styleUrl>
				<Point>
					<coordinates>-111.4986338383012,50.76539521736024,0</coordinates>
				</Point>
			</Placemark>
			<Placemark>
				<name>In Situ Hadrosaur Display</name>
				<LookAt>
					<longitude>-111.4977689721602</longitude>
					<latitude>50.76461862516347</latitude>
					<altitude>0</altitude>
					<heading>0.01396304143116994</heading>
					<tilt>4.108343153967957</tilt>
					<range>333.8625206938979</range>
					<gx:altitudeMode>relativeToSeaFloor</gx:altitudeMode>
				</LookAt>
				<styleUrl>#msn_flag2</styleUrl>
				<Point>
					<coordinates>-111.497145376955,50.76409759616326,0</coordinates>
				</Point>
			</Placemark>
			<Placemark>
				<name>Landslide Butte</name>
				<LookAt>
					<longitude>-112.6361755579755</longitude>
					<latitude>48.91190301555692</latitude>
					<altitude>0</altitude>
					<heading>0.4636757128316948</heading>
					<tilt>0</tilt>
					<range>3941.292356715163</range>
					<gx:altitudeMode>relativeToSeaFloor</gx:altitudeMode>
				</LookAt>
				<styleUrl>#msn_flag1</styleUrl>
				<Point>
					<coordinates>-112.643841678416,48.91041013615108,0</coordinates>
				</Point>
			</Placemark>
			<Placemark>
				<name>Little Sandhill Creek</name>
				<Camera>
					<longitude>-111.5393001480775</longitude>
					<latitude>50.74531178616299</latitude>
					<altitude>7338.457161685552</altitude>
					<heading>-48.27637302739705</heading>
					<tilt>0.02034417430760913</tilt>
					<roll>-48.37371004965006</roll>
					<gx:altitudeMode>relativeToSeaFloor</gx:altitudeMode>
				</Camera>
				<styleUrl>#msn_flag2</styleUrl>
				<Point>
					<coordinates>-111.5597083123912,50.74888582488648,0</coordinates>
				</Point>
			</Placemark>
			<Placemark>
				<name>Manyberries</name>
				<LookAt>
					<longitude>-110.6932367743632</longitude>
					<latitude>49.40168878731306</latitude>
					<altitude>0</altitude>
					<heading>2.466190538690544e-006</heading>
					<tilt>0</tilt>
					<range>60800.15516904651</range>
					<gx:altitudeMode>relativeToSeaFloor</gx:altitudeMode>
				</LookAt>
				<styleUrl>#msn_flag</styleUrl>
				<Point>
					<coordinates>-110.6932427463089,49.4016850410243,0</coordinates>
				</Point>
			</Placemark>
			<Placemark>
				<name>Onetree Creek</name>
				<Camera>
					<longitude>-111.5745097652678</longitude>
					<latitude>50.77448661221694</latitude>
					<altitude>7374.747910203131</altitude>
					<heading>-48.30363681172594</heading>
					<tilt>0.0203441742717711</tilt>
					<roll>-48.37371004958804</roll>
					<gx:altitudeMode>relativeToSeaFloor</gx:altitudeMode>
				</Camera>
				<styleUrl>#msn_flag2</styleUrl>
				<Point>
					<coordinates>-111.5933423670048,50.76994295673849,0</coordinates>
				</Point>
			</Placemark>
			<Placemark>
				<name>Public Loop Road within Natural Preserve</name>
				<LookAt>
					<longitude>-111.5004392062736</longitude>
					<latitude>50.76531390003179</latitude>
					<altitude>0</altitude>
					<heading>0.0118937285387776</heading>
					<tilt>4.109022275589385</tilt>
					<range>691.9503335658491</range>
					<gx:altitudeMode>relativeToSeaFloor</gx:altitudeMode>
				</LookAt>
				<styleUrl>#msn_flag2</styleUrl>
				<Point>
					<coordinates>-111.4999873851034,50.76600094217711,0</coordinates>
				</Point>
			</Placemark>
			<Placemark>
				<name>Rosebud Creek</name>
				<Camera>
					<longitude>-112.8382025718994</longitude>
					<latitude>51.35861755878207</latitude>
					<altitude>52131.40125387549</altitude>
					<heading>-64.03027792972075</heading>
					<tilt>0.01708428525155741</tilt>
					<roll>-63.14453754712584</roll>
					<gx:altitudeMode>relativeToSeaFloor</gx:altitudeMode>
				</Camera>
				<styleUrl>#msn_flag10</styleUrl>
				<Point>
					<coordinates>-112.8338235303557,51.32422907604703,0</coordinates>
				</Point>
			</Placemark>
			<Placemark>
				<name>Royal Tyrrell Museum of Paleontology</name>
				<LookAt>
					<longitude>-112.7887619709626</longitude>
					<latitude>51.47935009091208</latitude>
					<altitude>0</altitude>
					<heading>-0.4112184863039137</heading>
					<tilt>0</tilt>
					<range>409.1120177393888</range>
					<gx:altitudeMode>relativeToSeaFloor</gx:altitudeMode>
				</LookAt>
				<styleUrl>#msn_flag3</styleUrl>
				<Point>
					<gx:altitudeMode>clampToSeaFloor</gx:altitudeMode>
					<coordinates>-112.7892338034715,51.4794340083733,0</coordinates>
				</Point>
			</Placemark>
			<Placemark>
				<name>Steveville</name>
				<LookAt>
					<longitude>-111.5900633498003</longitude>
					<latitude>50.82965987872541</latitude>
					<altitude>0</altitude>
					<heading>1.088226442884465</heading>
					<tilt>0</tilt>
					<range>3991.281140924254</range>
					<gx:altitudeMode>relativeToSeaFloor</gx:altitudeMode>
				</LookAt>
				<styleUrl>#msn_flag2</styleUrl>
				<Point>
					<coordinates>-111.6010210745524,50.83793495314337,0</coordinates>
				</Point>
			</Placemark>
			<Placemark>
				<name>Steveville Railway Grade</name>
				<LookAt>
					<longitude>-111.6132585653633</longitude>
					<latitude>50.82398133294273</latitude>
					<altitude>0</altitude>
					<heading>-0.2723136632229442</heading>
					<tilt>0</tilt>
					<range>5942.406689981715</range>
					<gx:altitudeMode>relativeToSeaFloor</gx:altitudeMode>
				</LookAt>
				<styleUrl>#msn_flag2</styleUrl>
				<Point>
					<coordinates>-111.6305447217512,50.82512619117455,0</coordinates>
				</Point>
			</Placemark>
			<Placemark>
				<name>Three Hills Creek</name>
				<Camera>
					<longitude>-112.928477408862</longitude>
					<latitude>51.57342879591373</latitude>
					<altitude>17869.607708957</altitude>
					<heading>-64.08563357681409</heading>
					<tilt>0.01615145938570079</tilt>
					<roll>-63.19180602449151</roll>
					<gx:altitudeMode>relativeToSeaFloor</gx:altitudeMode>
				</Camera>
				<styleUrl>#msn_flag0</styleUrl>
				<Point>
					<coordinates>-112.9364774134949,51.54025127057007,0</coordinates>
				</Point>
			</Placemark>
			<Placemark>
				<name>Tolman Bridge</name>
				<LookAt>
					<longitude>-112.9692341755367</longitude>
					<latitude>51.85051053282432</latitude>
					<altitude>0</altitude>
					<heading>-8.419120246336943</heading>
					<tilt>0</tilt>
					<range>16883.49351718128</range>
					<gx:altitudeMode>relativeToSeaFloor</gx:altitudeMode>
				</LookAt>
				<styleUrl>#msn_ylw-pushpin180</styleUrl>
				<Point>
					<coordinates>-113.0158202679462,51.83772456170554,0</coordinates>
				</Point>
			</Placemark>
			<Placemark>
				<name>Trail of the Fossil Hunters</name>
				<LookAt>
					<longitude>-111.5021480150432</longitude>
					<latitude>50.76359645200659</latitude>
					<altitude>0</altitude>
					<heading>0.01057126369922581</heading>
					<tilt>4.108341190414326</tilt>
					<range>330.8113610370196</range>
					<gx:altitudeMode>relativeToSeaFloor</gx:altitudeMode>
				</LookAt>
				<styleUrl>#msn_flag2</styleUrl>
				<Point>
					<coordinates>-111.5015161199433,50.76442061563747,0</coordinates>
				</Point>
			</Placemark>
			<Placemark>
				<name>Two Medicine River</name>
				<LookAt>
					<longitude>-112.3504513529131</longitude>
					<latitude>48.48428308469281</latitude>
					<altitude>0</altitude>
					<heading>0.6775536845046274</heading>
					<tilt>0</tilt>
					<range>33907.51187456874</range>
					<gx:altitudeMode>relativeToSeaFloor</gx:altitudeMode>
				</LookAt>
				<styleUrl>#msn_flag1</styleUrl>
				<Point>
					<coordinates>-112.3519508987451,48.47403434962671,0</coordinates>
				</Point>
			</Placemark>
			<Placemark>
				<name>Wolf Coulee</name>
				<Camera>
					<longitude>-111.4154434340249</longitude>
					<latitude>50.73574943439114</latitude>
					<altitude>7279.526097452315</altitude>
					<heading>-48.18047408951948</heading>
					<tilt>0.02034417430760913</tilt>
					<roll>-48.37371004957227</roll>
					<gx:altitudeMode>relativeToSeaFloor</gx:altitudeMode>
				</Camera>
				<styleUrl>#msn_flag2</styleUrl>
				<Point>
					<coordinates>-111.4287073709853,50.73531304843179,0</coordinates>
				</Point>
			</Placemark>
			<Placemark>
				<name>UALVP Camp, 2008-2012</name>
				<description>Dr. Philip Currie and his team have camped near Happy Jack&apos;s each summer since 2008.</description>
				<Camera>
					<longitude>-111.4127228368812</longitude>
					<latitude>50.7573327218846</latitude>
					<altitude>382.0522879351058</altitude>
					<heading>-48.17155278679214</heading>
					<tilt>0.0203458633734285</tilt>
					<roll>-48.36690530819318</roll>
					<gx:altitudeMode>relativeToSeaFloor</gx:altitudeMode>
				</Camera>
				<styleUrl>#msn_flag2</styleUrl>
				<Point>
					<coordinates>-111.412207175983,50.75729732888664,0</coordinates>
				</Point>
			</Placemark>
		</Folder>
	</Folder>
</Document>
</kml>
