# Supplementary material for: Euoplocephalus tutus and the Diversity of Ankylosaurid Dinosaurs in the Late Cretaceous of Alberta, Canada, and Montana, USA
Source: PLoS One. 2013 May 8;8(5):e62421. doi: 10.1371/journal.pone.0062421 (PMC3648582; doi:10.1371/journal.pone.0062421)
Supplement: Table S1 — (XLSX) [file pone.0062421.s020.xlsx]

## Sheet: Sheet1
Table S1 – Locality information for specimens referred to Anodontosaurus lambei, Dyoplosaurus acutosquameus, Euoplocephalus tutus, and Scolosaurus cutleri.
Specimen	Collector/Year	Locality Information	Source	Notes
AMNH 5211	B. Brown, P. Kaisen, 1910	“No. 11 Ankylosaurus caudal plate same locality + level as no. 12”; “No. 12 Trachodon left scapula 50 feet above river 1 ½ mile above Tolman’s”	AMNH Collections Database; AMNH Vertebrate Paleontology Archives: Barnum Brown 1908-1911 Notebook
AMNH 5216	B. Brown, P. Kaisen, 1911	½ mile above Tolman Ferry, left bank; “No. 18 = Ankylosaur tail section with plate 30 ft above river Tolman Ferry”	AMNH Vertebrate Paleontology Archives: Barnum Brown 1908-1911 Notebook	Part of AMNH traveling exhibit Dinosaurs: Ancient Fossils, New Discoveries as of 2013.
AMNH 5223	B. Brown, P. Kaisen	2 mi. below Tolman Ferry, right bank	AMNH Collections Database
AMNH 5238	B. Brown, 1911	Near mouth of Berry Creek	AMNH Collections Database; AMNH Vertebrate Paleontology Archives: Barnum Brown 1908-1911 Notebook	This is probably near Steveville in Dinosaur Provincial Park.
AMNH 5266	B. Brown, P. Kaisen, Sternberg, Olsen, 1912	10 mi. below Tolman Ferry, right bank 150 feet above the river; ?Section 32 T31 R21	Specimen cards; AMNH Collections Database; AMNH Vertebrate Paleontology Archives: Barnum Brown 1908-1911 Notebook
AMNH 5337	B. Brown, P. Kaisen, 1914	Sand Creek, right bank 125 feet above river 12 mi. below Steveville Red Deer River	AMNH Collections Database	Sand Creek is an alternate name for Little Sandhill Creek in Dinosaur Provincial Park. Pelvis on display at AMNH.
AMNH 5403	B. Brown, P. Kaisen, 1913	Steveville 1 ½ mi. below, left bank 40 feet above river	AMNH Collections Database	This is in Dinosaur Provincial Park.
AMNH 5404	B. Brown, P. Kaisen, 1913	Steveville 12 mi. below, right bank 75 feet above river; Sternberg Map #60; UTM NAD83 E464501.570, N5623591.470	AMNH Collections Database; Currie and Koppelhus (2005) supplementary CD ROM; Sternberg 1950	AMNH 5404 has both field note data and GPS coordinates, but these do not agree. AMNH 5404 seems to be more like 6 mi downstream of Steveville rather than 12 mi, using GPS data. Skull on display at AMNH.
AMNH 5405	B. Brown, P. Kaisen	Steveville 12 mi., right bank 75 feet above river	AMNH Collections Database	This is in Dinosaur Provincial Park.
AMNH 5406	B. Brown, P. Kaisen	Steveville 1 mi. below, left side 75 feet above river	AMNH Collections Database	This is in Dinosaur Provincial Park.
AMNH 5409	B. Brown, P. Kaisen	Steveville 1 ½ mi. below, left bank 20 feet above river; Sternberg Map #7; UTM NAD83 E457353.919, N5629594.606	AMNH Collections Database; Currie and Koppelhus (2005) supplementary CD ROM; Sternberg 1950
AMNH 5470	B. Brown, P. Kaisen, Johnson	Two Medicine River, Montana, Glacier County, 16 mi SW of Cut Bank	AMNH Collections Database
AMNH 20870		Two Medicine, Montana	Specimen card
CMN 135	CM Sternberg 10 June 1919	“...southwest extremity of badlands near prairie level, south branch of Little Sandhill Creek.”	Specimen card; CH Sternberg field notes 1919	This is in Dinosaur Provincial Park.
CMN 210	L.M. Lambe, 18 August 1897	East side of Red Deer River at mouth of Berry Creek	Data provided by M. Currie (CMN), 18 Jan 2012, from Lambe field notes	Holotype of Euoplocephalus tutus. This is in Dinosaur Provincial Park.
CMN 349	C.H. Sternberg; 13 June 1914	“… south side of Red Deer River, three miles above “Happy Jack Ferry” (Belly River Fm., Dead Lodge Canyon).	Data provided by M. Currie (CMN), 18 Jan 2012, from Sternberg field notes	This is in Dinosaur Provincial Park. Tail club on display at CMN.
CMN 2252	C.H. Sternberg; 1914	Sticker on specimen reads 1914-5; “Section of club...Sand Creek”	CH Sternberg field notes 1914	This is in Dinosaur Provincial Park.
CMN 8530	GF Sternberg, 9 September 1916	"Armoured dinosaur. Found by G.F. Sternberg opposite Neil's ranch house on the river 8 miles southwest of Morrin, 90 feet above water...This specimen seems to be badly scattered in a bone bed, but there are so many plates I feel sure it is one individual." (G.F. Sternberg 1916); "It was collected by G.F. Sternberg in 1916, from the Edmonton formation, 90 feet above Red Deer river, in sec. 3, tp 2…	Specimen card; Sternberg (1929); GF Sternberg Field Notes 1916; D. Eberth pers. comm. 3 Oct 2012	Holotype of Anodontosaurus lambei
CMN 8876	H. Lowe, 22 June 1937	“13. 5 miles a little east of south of Manyberries. In SW1/4 of Section 20, T. 3, R. 5, west of 4th meridian. In clay bed midway between two massive sandstone beds; below the middle of the section exposed at this spot.”	Data provided by M. Currie, 2011/2012, CMN
FPDM V-31	Canada Fossils Ltd., 1997	Private land, Blackfeet Indian Reservation, Montana; same property as NSM PV 20381 but different locality	Pers. comm. A. Dzindic, 3 Dec 2010	Originally nicknamed “Peggy”. On display as mounted skeleton at FPDM.
NHMUK R4947	Cutler	Red Deer River		Specimen card says “Purch WE Cutler July 1923”, but it is unclear if this was also the year (or close to the year) it was collected.
NHMUK R5161	WE Cutler, 1914	“Professor Parks of Toronto informed F. A. Bather, the Keeper of the Natural History Museum in London, that according to information gained from Mr. Levi Sternberg ,,it seems that the specimen was found in the Belly River Series, Upper Cretaceous, about one half mile below <<Happy Jack>> ferry on the Red Deer River. This would make the location in Dead Lodge Canyon...” Nopcsa (1928:54); Sternberg…	Nopcsa (1928); CH Sternberg field notes 1914; Currie and Koppelhus (2005) supplementary CD ROM; Sternberg 1950	Holotype of Scolosaurus cutleri. C.H. Sternberg (1914) field notes indicate Cutler was on the south side of the river: “Drove out to camp at Happy Jack’s and pitched our tents…Saw Mr. Cutlers camp across the river.” On display as panel mount at NHMUK.
NHMUK R8265	CH Sternberg 1915	Red Deer River	Specimen card
NHMUK R36629-R36631	WE Cutler, 1914	Mexico Ranch, “Laehodon Pkg”	Specimen cards	Mexico Ranch is also known as Happy Jack’s, or Happy Jack Ferry. This is in Dinosaur Provincial Park.
NSM PV 20381	Canada Fossils Ltd., 1996	Private land, Two Medicine Formation, Montana; same property as FPDM V-31 but different locality	Pers. comm. A. Dzindic, 27 Sept 2011	Originally nicknamed “Olive”. On display as mounted skeleton at NSM.
MACN Pv 12554	L. Sternberg, 1926	“Specimen No 6 About four and a half feet of the tail and the tail club of a large armoured dinosaur. Found by L. Sternberg about a mile east of the River and a mile southeast of Steveville (100 feet above the river.) (Sent to Buenos Aires in an exchange.) Nodosauridae.”	L. Sternberg Field Notes 1926 (ROM)	This is in Dinosaur Provincial Park. Tail club on display at MACN.
MOR 433	1986	Top Two Medicine Fm. Locality TM-034 Ank Landslide Butte, Glacier Co.	Specimen card
ROM 784	1919, L. Sternberg	“1 mile south of river 2.5 miles up from Happy Jack Ferry.”; UTM NAD83 E466,786.580 N5,622,422.480; Sternberg Map #93	L. Sternberg Field Notes 1919 (ROM); Currie and Koppelhus (2005) supplementary CD ROM; Sternberg 1950	Holotype of Dyoplosaurus acutosquameus
ROM 788	L. Sternberg, 1921	“Specimen No 9 Large tail club with about 4 feet of tendons in place. This was found about 1/2 mile south of Nos 1 & 3. There are two sections, one with club and one with tendons. (Cat. No. 4973 ct old and 788 new number. Armoured, tail club, mounted in gallery.)”; Specimen # 1 is Prosaurolophus maximus: “on a branch of the main Sand Hill Creek about 2 miles from the mouth (where it empties into …	L. Sternberg Field Notes 1921 (ROM)	This is in Dinosaur Provincial Park. Tail club on display at ROM.
ROM 813	L. Sternberg 1919	“This specimen is a plated fellow. Found about one-half mile north west of Jackson's Ranch, just below a large, sharp point or butte, 100 feet above the river level (aneroid)”; Sternberg Map #103; UTM NAD83 E470035.390, N5623289.679	L. Sternberg Field Notes 1919 (ROM); Currie and Koppelhus (2005) supplementary CD ROM; Sternberg (1950)
ROM 832	26 September 1916 GF Sternberg	“Found by G.F. Sternberg, opposite Neal’s ranch, sec. 10, T. 31, R. 21…Found 7 miles southwest of Morrin, about 75 feet above the water. This is the skull and first ring of plates. The ring of plates is complete and the back part of the skull is complete, but the front part is all broken up though I have all fragments...The top is preserved the best as it lay upside down.”	G.F. Sternberg Field Notes 1916	Exchanged with ROM, March 1930
ROM 1930	GF Sternberg 1914	“This specimen is about 60’ below the coal seam and 250’ above the river.” “Stegoasur Europlocephalus [sic] GHS. About 15 feet of body including head. Sacrum Pelvis arch limbs a few feet of the tail. Evidently the entire skeleton except tail ____? On south side river about 3 miles below “Happy Jack Ferry” Preserved in hard grey sand stone concretion covering a floor about 15 x 20 ft. and 35 ft. h…	CH. Sternberg Field Notes 1914 (GSC/CMN); Currie and Koppelhus (2005) supplementary CD ROM; Sternberg (1950)	Originally collected for GSC/CMN, traded to ROM for Styracosaurus skeleton. Currie and Koppelhus (2005) include coordinates for a specimen called ROM 2162 (“scattered skeleton”), collected by CH Sternberg in 1914, however, there does not appear to be a specimen ROM 2162. The only ankylosaur collected by CH Sternberg in 1914 was ROM 1930, which was also a scattered skeleton. The GPS coordinates co…
ROM 7761	L Sternberg, 19 July 1954	Could possibly be: “Levi drove over to another ranch for some prospecting, but won’t say what he did. I found later that he got a small Ankylosaur tail club and saw a scattered skeleton, but no action was taken.”	A.G. Edmund Field Notes 1954 (ROM)
TMP 1979.14.164		Dinosaur Provincial Park	TMP Collections Database
TMP 1982.9.3	TMP crew	“Fox Coulee; LSD 14-16-29-20W4; record says Midland Prov Pk, but location is Fox Coulee, east of tracks close to Fox Coulee BB”	D. Eberth, pers. comm. 3 Oct 2012
TMP 1983.36.120	TMP crew	Dinosaur Provincial Park, S32 T020N R11W M04	TMP Collections Database	On display at TMP Field Station, Dinosaur Provincial Park Visitor Centre
TMP 1984.121.33		Donation from Calgary Zoo, no locality data	Specimen card, TMP Collections Database
TMP 1991.36.321	TMP crew	Dinosaur Provincial Park	TMP Collections Database
TMP 1991.127.1	TMP crew	Steveville Area, Dinosaur Provincial Park; 04 R12W T021N S33	TMP Collections Database
TMP 1993.36.421	TMP crew	Dinosaur Provincial Park	TMP Collections Database
TMP 1994.168.1	Kurt Armbruster, TMP crew	Bleriot Ferry, Drumheller Valley; Horsethief Canyon, northern portion, along trail to TMP Day Digs bonebed excavation	Specimen card; Pers. comm. D. Eberth October 2012
TMP 1996.75.01	TMP crew	Three Hills Locality, Three Hills Creek, S16 T020N R22W 04; UTM = 12: 359755; 5714550; Three Hills Creek, downstream from HWY 836 intersection with creek.	Specimen card, TMP Collections Database; Pers. comm. B. Strilisky July 2012; pers. comm. D. Eberth 3 Oct 2012
TMP 1997.59.1	TMP crew	Rosebud Creek, S12 T027N R22W 04; UTM = 12; 362800; 5684000	TMP Collections Database, pers. comm. B. Strilisky July 2012
TMP 1997.132.01	TMP crew	Hilda; UTM = 12; 543367; 5596003	TMP Collections Database; B. Strilisky pers. comm. July 2012	Collected from an iron-rich channel sandstone about 30m above the Oldman/Dinosaur Park contact; DPF in this area is about 60m thick; specimen’s stratigraphic position correlates roughly with middle of DPF at Dinosaur Provincial Park (pers. comm. D. Eberth, July 2011)
TMP 1998.83.1	D. Brinkman	UTM NAD83 E463074.172, N5624441.138	Currie and Koppelhus (2005), supplementary CD ROM
TMP 2000.57.30	D. Brinkman	Onefour, Sage Creek; 12 546114; 5432108	Specimen card, TMP Collections Database
TMP 2001.42.9	Canada Fossils Ltd, 1998	Blackfeet Indian Reservation, Montana	Pers. comm. A. Dzindic, 23 Feb. 2010	Originally nicknamed “Uma”.
TMP2003.12.166	B. Bohdanowicz, 12 May 2003	Dinosaur Provincial Park, Iddesleigh; 12 474069; 5623906	Specimen card
TMP 2003.12.311	W Sloboda, 2003	UTM NAD83 E474080 N5623890	Currie and Koppelhus (2005), supplementary CD ROM
UALVP 31	GF Sternberg, 1921	¾ mile southeast of Steveville, 225 feet (aneroid) above the river (Gilmore 1923); GPS coordinates; Steveville #1; Sternberg Map #2; UTM NAD83 E458172.517, N5631004.186	Gilmore 1923, UALVP catalogue; Sternberg (1950); Currie and Koppelhus (2005), supplementary CD ROM	Skull on display at UALVP.
UALVP 16247	LA Lindoe 1969	Dinosaur Provincial Park, Steveville #14	Specimen display card; UALVP catalogue; UALVP field notes	Tail club on display at UALVP.
UALVP 45931	L Lindoe	Hilda #1; LSD 13, S8, T18, R3, W4	UALVP catalogue, pers. comm. LA Lindoe July 2012	“...in the vicinity of Hilda 1 which is a micro site…The ankylosaur site would be higher than the micro site and on the main valley wall as opposed to out on the point where the micro site and the ceratopsian sites were.” LA Lindoe, July 2012
UALVP 47273	P. Bell, P. Currie, 15 July 2006	Dinosaur Provincial Park, Bonebed 91A	UALVP catalogue
UALVP 47977	DW Krause, 1970	Dinosaur Provincial Park, “Happy Jack’s”	UALVP catalogue; UALVP field notes
USNM 7943	C.W. Gilmore	37N, 8W, Milk River, 1 mi. North of Blackfeet Indian Reservation, Two Medicine	Specimen card
USNM 10753	GF Sternberg, T Hardy, 14 Sept 1916	“Found by Tomas Hardy, September 14, 7 miles west, 2 north of Morrin, Alta, sec. 28, T. 31, R. 21, on old Joe’s place…East side of river about 50 feet above the water.”; “2 miles up river from Starland Rec Area (east side)” (Eberth)	Specimen card; GF Sternberg Field Notes 1916; D. Eberth pers. comm. 3 Oct 2012	Exchanged with the USNM in May 1922
USNM 11892	GF Sternberg, 26 May 1928	Glacier County, NW ¼, Sec 27, T37N, R8W, 0.5 mi S of Milk River; “collected by George F. Sternberg, May 26, 1928, from the Two Medicine formation, Upper Cretaceous, from the south side of Milk River, NW ¼ sec. 27, T. 37, N., R. 8 W., on the Blackfeet Indian Reservation, Glacier County, Mont.” (Gilmore 1930:32)	Specimen card; Gilmore 1930	Originally referred to Dyoplosaurus by Gilmore (1930)
USNM 16747	C.W. Gilmore 1928	Glacier County, Montana, Sec 27, 37N, 8W Blackfeet Indian Reservation, Two Medicine	Specimen card
