# Supplementary material for: Euoplocephalus tutus and the Diversity of Ankylosaurid Dinosaurs in the Late Cretaceous of Alberta, Canada, and Montana, USA
Source: PLoS One. 2013 May 8;8(5):e62421. doi: 10.1371/journal.pone.0062421 (PMC3648582; doi:10.1371/journal.pone.0062421)
Supplement: Table S2 — (XLSX) [file pone.0062421.s021.xlsx]

## Sheet: Sheet1
Table S2: General dimensions of skulls examined for this study, in millimeters.
Note: UALVP 47977 is incomplete, so the width is estimated by measuring from the lateral edge of the orbit to the midline of the ventral side of the skull, then doubling.
Specimen	Skull: Widths					Skull: Lengths		Mandible
	Across loreal caputegulae	Immediately anterior to orbits (ventral view)	Across supraorbitals at midlength of orbits (dorsal view)	Anterior edge of quadratojugal horns (ventral view)	Across squamosal horns	To posterior edge of occipital condyle (ventral view)	To posterior edge of nuchal crest (dorsal view)	Length	Height at symphysis	Maximum height
AMNH 5223		230			310	303
AMNH 5238		258	241		339	345	363
AMNH 5337						392		310	22	105
AMNH 5403				290		410
AMNH 5403		252	353		365			318	24	93
AMNH 5405		225	372		385	384	355	292	22	83
CMN 0210	201
CMN 8530	212	195	319		300	352
MOR 433		312	354		383
NHMUK R4947				270		370
ROM 784			224
ROM 832		280			355		345
ROM 1930		301		280	392	368
TMP 1979.14.164			385	394	399
TMP 1996.75.01
TMP 1996.127.1		240	320		303	370
TMP 1997.59.1				330			>370
TMP 1997.132.1			355	260	357	378
TMP 2001.42.19			263		288
UALVP 31	242		313	260	278		355	259	30	66
UALVP 47977			367 *
USNM 11892		210	322		317
