# Supplementary material for: Euoplocephalus tutus and the Diversity of Ankylosaurid Dinosaurs in the Late Cretaceous of Alberta, Canada, and Montana, USA
Source: PLoS One. 2013 May 8;8(5):e62421. doi: 10.1371/journal.pone.0062421 (PMC3648582; doi:10.1371/journal.pone.0062421)
Supplement: Table S3 — (XLSX) [file pone.0062421.s022.xlsx]

## Sheet: Sheet1
Table S3: Detailed measurements of skulls examined for this study, in millimeters.
	Premaxilla	Vomers	Quadrate condyle	Braincase		Occipital condyle		Foramen magnum		Paroccipital process	Mandibular caputegulum
Specimen	Width	Length	Width	Length	Width	Width	Height	Width	Height	Length	Length
AMNH 5223				75	76	62	33	26	25
AMNH 5238
AMNH 5337	191	170	57	75	64	73	41	28	31	133	183
AMNH 5403			64				72	33	29	113
AMNH 5403	232	173		101	73						180
AMNH 5405	184	164	54	75	60	64	28	32	27	123	190
CMN 0210
CMN 8530	188		38	82		50		26	12
MOR 433				94	61	61	29
NHMUK R4947			29			67	39	23	26	85
ROM 832				85	77.3	66
ROM 1930	223	158	42			68	41	26	25	91
TMP 1979.14.164						61	43	27	28	132
TMP 1996.75.01
TMP 1996.127.1	157	102	35	81		54		32	21
TMP 1997.59.1						61	40
TMP 1997.132.1			51			68	43	32	19	90
UALVP 31	176		47								193
UALVP 47977						65	36
USNM 11892			38	70	56	55	26	22	21	105
