# Supplementary material for: Euoplocephalus tutus and the Diversity of Ankylosaurid Dinosaurs in the Late Cretaceous of Alberta, Canada, and Montana, USA
Source: PLoS One. 2013 May 8;8(5):e62421. doi: 10.1371/journal.pone.0062421 (PMC3648582; doi:10.1371/journal.pone.0062421)
Supplement: Table S4 — (XLSX) [file pone.0062421.s023.xlsx]

## Sheet: Sheet1
Table S4: Measurements of the cervical and dorsal vertebrae, in millimeters.
Notes: Measurements for NHMUK R5161 are taken from Nopcsa (1929).
Specimen	Position	Centrum			Neural Spine			Transverse Process	Notes
		Length	Width	Height	Length	Width	Height	Length (cervicals); height (dorsals)
	Cervicals
AMNH 5403	axis	122 (134 with odontoid)							severely crushed
AMNH 5403	unknown	87		79					#3, severely crushed
AMNH 5403	unknown	65	79	82			97		severely crushed
AMNH 5403	unknown	53	86	75			111		severely crushed
AMNH 5337	unknown	76	96	91			133	98
AMNH 5337	unknown	88	104	92			137	102
NHMUK R5161	Uncertain	75
UALVP 31	axis	97 (without odontoid)					74
UALVP 31	unknown		82	80
	Dorsals
AMNH 5337	1	104	113	103			170	110
AMNH 5337	2	117	108	106			189	82	#9
AMNH 5337	3	120	109	105					#6
AMNH 5337	4	125	109	112			190	98	#7
AMNH 5337	5	121	116	110				89	#8, ribs fused
AMNH 5337	6	115	116	107					#5, ribs fused
AMNH 5337	7	112	120	112				100	#4, ribs fused
AMNH 5337	8	110	106	108				102	#3, ribs fused
AMNH 5337	9	108	124	113					#2, ribs fused
AMNH 5337	10	113	128	107				94	#1, ribs fused
AMNH 5406	A	88	84	85				90
AMNH 5406	B	87	81	85				88
AMNH 5406	C	80	91	85					ribs fused
NHMUK R5161	Uncertain	115	156
ROM 813	unknown	104		98			123
ROM 1930	unknown	106	87	91
ROM 1930	unknown	98	99	104	63	16	213	82
ROM 1930	unknown	101	90	89	77	8	209	64
TMP 1982.9.3	unknown	92	88						ribs fused
TMP 1982.9.3	Unknown	89		69					ribs fused
