# Supplementary material for: Euoplocephalus tutus and the Diversity of Ankylosaurid Dinosaurs in the Late Cretaceous of Alberta, Canada, and Montana, USA
Source: PLoS One. 2013 May 8;8(5):e62421. doi: 10.1371/journal.pone.0062421 (PMC3648582; doi:10.1371/journal.pone.0062421)
Supplement: Table S6 — (XLSX) [file pone.0062421.s025.xlsx]

## Sheet: Sheet1
Table S6: Measurements of the handle vertebrae of the tail club, in millimeters.
Specimen	Position	Neural Arch		Neural Spine	Prezygapophysis	Centrum			Neural spine angle (see Arbour et al. 2009)
		Total Length	Width	Length	Length	Length	Width	Height
AMNH 5245	A		28	100
AMNH 5245	B		38		130	114
AMNH 5245	C
AMNH 5245	I		35	87					35
AMNH 5245	II	26	39	109	156				20
AMNH 5245	III	27	29	120	171				15
AMNH 5245	IV	28	29	82	196				20
CMN 349	unknown						54	31
ROM 784	1			101		88	77	52	20
ROM 784	2	28	37	95	187	103	66		17
ROM 784	3	29	43	87	200				26
ROM 784	4	29	47	88	195				19
ROM 784	5	28	45	84	194				20
ROM 784	6	26	44	72	181				22
ROM 784	7	26	45	77	186				20
ROM 784	8	25	39	89	172				28
ROM 784	9	21	41	56	167				30
ROM 784	10		52		136
ROM 788	A			98					30
ROM 788	B		31	143	131				25
ROM 788	C		33	158	118				26
ROM 788	D			138	156
ROM 788	E			156					20
ROM 788	F		32	223	152				22
ROM 788	G			126	167				21
ROM 788	H			131	151				55
TMP 1998.93.65	unknown					142	73	56
UALVP 47273	A		23		84				25
UALVP 47273	B	25	39	17	71				14
UALVP 47273	C	21	40	123	59				21
UALVP 47273	D	23	41	128	79				19
UALVP 47273	E	24	41	153	57				28
UALVP 47273	F		42
