# Supplementary material for: Euoplocephalus tutus and the Diversity of Ankylosaurid Dinosaurs in the Late Cretaceous of Alberta, Canada, and Montana, USA
Source: PLoS One. 2013 May 8;8(5):e62421. doi: 10.1371/journal.pone.0062421 (PMC3648582; doi:10.1371/journal.pone.0062421)
Supplement: Table S8 — (XLSX) [file pone.0062421.s027.xlsx]

## Sheet: Sheet1
Table S8: Measurements of the pelvic girdle and hindlimb elements, in millimeters.
Notes: UALVP 31 and TMP 1982.9.3 are incomplete but preserve half of the pelvis, so the width was measured to the midline of the sacral vertebrae and doubled. Measurements of NHMUK R5161 are from Nopcsa (1929).
		AMNH 5266	AMNH 5404	AMNH 5409	NHMUK R5161	ROM 784	ROM 813	TMP 1982.9.3	TMP 1997.132.1	TMP 2001.42.19	UALVP 31
Pelvis	Length			920				600
	Maximum width			1690				*1160			*939
	Ischium height				505		490			377
	Ischium proximal length				220		220			149
	Ischium distal length				67		60
Femur	Length	255	535		600	562		486		~430	515
	Proximal width		165
	Distal width		197					181		130	154
	Length to proximal edge of 4th trochanter		279								250
Tibia	Length	190	421		415		415			310
	Proximal width		160							156	149
	Distal width		210						229	186
